# Selection constrains phenotypic evolution in a functionally important plant trait

Christopher D. Muir<sup>1</sup>

<sup>1</sup>Biodiversity Research Centre and Botany Department, University of British Columbia,  
Vancouver, British Columbia, Canada  
6270 University Blvd.  
Vancouver, BC, Canada V6T 1Z4  
E-mail: [cdmuir@biodiversity.ubc.ca](mailto:cdmuir@biodiversity.ubc.ca)  
Phone: (778) 228-4851

Keywords: Adaptive landscape | phenotypic constraint | stomata | amphistomy |  
phylogenetic comparative methods

# Abstract

A long-standing idea is that the macroevolutionary adaptive landscape – a ‘map’ of phenotype to fitness – constrains evolution because certain phenotypes are fit, while others are universally unfit. Such constraints should be evident in traits that, across many species, cluster around particular modal values, with few intermediates between modes. Here, I compile a new global database of 599 species from 94 plant families showing that stomatal ratio, an important functional trait affecting photosynthesis, is multimodal, hinting at distinct peaks in the adaptive landscape. The dataset confirms that most plants have all their stomata on the lower leaf surface (hypostomy), but shows for the first time that species with roughly half their stomata on each leaf surface (amphistomy) form a distinct mode in the trait distribution. Based on a new evolutionary process model, this multimodal pattern is unlikely without constraint. Further, multimodality has evolved repeatedly across disparate families, evincing long-term constraint on the adaptive landscape. A simple cost-benefit model of stomatal ratio demonstrates that selection alone is sufficient to generate an adaptive landscape with multiple peaks. Finally, phylogenetic comparative methods indicate that life history evolution drives shifts between peaks. This implies that the adaptive benefit conferred by amphistomy – increased photosynthesis – is most important in plants with fast life histories, challenging existing ideas that amphistomy is an adaptation to thick leaves and open habitats. I conclude that peaks in the adaptive landscape have been constrained by selection over much of land plant evolution, leading to predictable, repeatable patterns of evolution.

1 The topography of the macroevolutionary adaptive landscape is thought to shape  
 2 the broad patterns of life's diversity [1]. Adaptive landscapes with multiple peaks  
 3 are manifest in convergent evolution of similar phenotypes across independent evo-  
 4 lutionary lineages. In such cases, surveys across species should reveal a multimodal  
 5 trait distribution in which the modes point to the underlying peaks in the landscape.  
 6 Multimodality has been observed frequently among plants and animals, including  
 7 traits such as self-incompatibility [2], the precocial-altricial spectrum [3], pollination  
 8 syndromes [4], ecomorphology in *Anolis* [5], and plant height [6]. That such disparate  
 9 classes of traits show broadly similar patterns suggests that divergence on a multi-  
 10 peaked adaptive landscape may be a general feature of macroevolution. However, we  
 11 rarely know whether multimodality reflects constraints imposed by the underlying  
 12 adaptive landscape and not some other constraint on phenotypic evolution.

13 In particular, certain phenotypes may be common not because they are more fit,  
 14 but rather because they are genetically, developmentally, or functionally accessible.  
 15 Conversely, rare phenotypes might be inaccessible. I use the definitions given by  
 16 Arnold [7]: genetic constraints are limitations set by the "pattern of genetic variation  
 17 and covariation for a set of traits"; developmental constraints are limitations on "pos-  
 18 sible developmental states"; and functional constraints are imposed by "time, energy,  
 19 or the laws of physics". Arnold contrasts these with selective constraints determined  
 20 by the adaptive landscape. There are examples of genetic [8], developmental [9],  
 21 and functional [10] constraints on phenotypic evolution acting in nature, meaning  
 22 that we cannot assume selection alone shapes trait evolution. Compelling evidence  
 23 from cross species comparisons that selection constrains phenotypic evolution re-  
 24 quires showing that phenotypic evolution is constrained, that selection is sufficient  
 25 to explain the inferred constraint, and that nonselective constraints are inconsistent

26 with these observations.

27 Here, I evaluate evidence for selective constraints on a functionally important plant  
28 trait, stomatal ratio, using comparative methods and theory. Stomatal ratio, defined  
29 as the ratio of upper to lower stomatal density, impacts how plants ‘eat’ (i.e. as-  
30 similate CO<sub>2</sub> from the atmosphere via photosynthesis). Physiological experiments  
31 and biophysical theory demonstrate that amphistomatous leaves, those that have  
32 equal stomatal densities on both upper and lower surfaces, maximize photosynthetic  
33 rate by minimizing the distance between substomatal cavities and chloroplasts, fa-  
34 cilitating rapid CO<sub>2</sub> diffusion [11, 12, 13, 14]. Hence, nearly all plants should be  
35 amphistomatous to maximize photosynthesis, yet paradoxically up to 90% of plant  
36 species in some communities are hypostomatous [15, 16, 17, 18], meaning that most  
37 stomata are on the lower surface. In rare cases, most stomata are on the upper sur-  
38 face (hyperstomy). I use upper and lower rather than abaxial and adaxial, because  
39 the former applies to ‘upside-down’ (i.e. resupinate) leaves. Stomatal ratio is a quan-  
40 titative metric that describes continuous variation between hypo- and hyperstomy.

41 Multiple lines of evidence indicate selection on stomatal ratio, but there is little  
42 consensus on the adaptive significance. Stomatal ratio varies widely, but nonran-  
43 domly [15, 17, 11, 19, 20, 21] and evolves rapidly in some taxa, possibly due to  
44 selection [22, 23, 24]. Several environmental and anatomical factors have been hy-  
45 pothesized to favour amphistomy (Table 1). The mechanistic details and literature  
46 underlying these hypotheses and predictions are described in Text S1. The prepon-  
47 derance of hypostomy almost certainly reflects a cost of upper stomata. For example,  
48 hypostomy has evolved anew in resupinate leaves [25]. Upper stomata might be costly  
49 because they increase susceptibility to foliar pathogens (e.g. rust fungi) that infect  
50 through stomata [13], suggesting that stomatal ratio mediates a tradeoff between

51 photosynthetic rate and defence [23], but other costs have been proposed (Text S1).  
 52 Identifying the selective forces (i.e. fitness benefits and costs) shaping stomatal ratio  
 53 have been hampered by four methodological limitations. Namely, previous studies  
 54 were typically qualitative rather than quantitative, confined to specific geographic re-  
 55 gions or clades, did not account for phylogenetic nonindependence, and did not take  
 56 into account multiple confounding factors. To overcome these limitations, I assem-  
 57 bled a quantitative, global, and phylogenetically extensive database that disentangles  
 58 correlated predictor variables (e.g. light level and leaf thickness).

59 This new dataset revealed that stomatal ratio is a multimodal trait (Fig. 1). To  
 60 test whether the observed pattern is consistent with constraint, I modified previous  
 61 evolutionary process models to accommodate bounded traits like stomatal ratio. Fit-  
 62 ting this model to the data indicates that stomatal ratio is highly constrained by a  
 63 rugged adaptive landscape with multiple selective regimes (for discussion of selective  
 64 regimes, see [26, 27, 5]). This led me to evaluate whether selection is sufficient to  
 65 account for inferred constraints using theoretical and empirical approaches. First, I  
 66 constructed a simple cost-benefit model consistent with the underlying physics and  
 67 a minimum of additional assumptions. This model indicates that distinct peaks in  
 68 the adaptive landscape can result from selective constraints, even when the under-  
 69 lying environmental gradients are smooth. In contrast, a review of the literature  
 70 does not support a large role for genetic, developmental, and functional constraints.  
 71 Finally, phylogenetic multiple regression identifies life history evolution as the pri-  
 72 mary selective agent underlying peak shifts, but anatomical and climatic factors are  
 73 also important. By merging theory and data, this study adduces compelling new  
 74 evidence that selection is the primary constraint on phenotypic evolution, at least  
 75 for stomatal ratio. There is no reason to believe this trait is exceptional among func-

76 tional traits, and hence the inferences drawn here could be generalizable to many  
77 other phenotypes that exhibit similar patterns indicative of evolutionary constraint.

## 78 Results

### 79 Stomatal ratio evolution is constrained by multiple selective 80 regimes

81 I compiled a new, global dataset from 25 previously published studies (Text S2)  
82 containing trait data (stomatal ratio and leaf thickness) on 599 species across 94  
83 plant families; the dataset with trait and climate data comprised a 552 species subset  
84 covering 90 families. The most striking feature of the data is that stomatal ratio (SR)  
85 is highly multimodal (Fig. 1), with apparent modes at 0 (hypostomatous),  $\approx 0.5$   
86 (amphistomatous), and 1 (hyperstomatous). Note that here I am reporting stomatal  
87 ratio as the ratio of upper density to total density so that the distinct hypo- and  
88 hyperstomatous modes can be seen. Stomatal ratio does not conform to a nonmodal,  
89 uniform distribution (Komologrov-Smirnov test,  $D = 0.433$ ,  $P = 1.11 \times 10^{-15}$ ),  
90 even after removing all hypostomatous (SR = 0) species (K-S test,  $D = 0.293$ ,  
91  $P = 1.33 \times 10^{-15}$ ). The data are also inconsistent with a unimodal, truncated  
92 exponential distribution bounded by 0 and 1 (K-S test,  $D = 0.429$ ,  $P = 1.11 \times 10^{-15}$ ).

93 In contrast, the distribution of stomatal ratio values across species is consistent  
94 with an evolutionary process model that includes constraints imposed by multiple  
95 selective regimes, indicating a rugged adaptive landscape. Although the results pre-  
96 sented in this section only identify constraint, not necessarily selective constraint,

I use selective regime because evidence in the following sections indicates that selection is the primary constraint. To infer regimes, I augmented a commonly used model of selective regimes, the Ornstein-Uhlenbeck process [28], to account for traits like SR that are bounded by 0 and 1 (see Materials and Methods and Text S3 for further detail and mathematical derivation). Under a bounded Ornstein-Uhlenbeck process model, the stationary distribution of stomatal ratio (or any proportion trait)  $r$  follows a Beta distribution:

$$f(r) = \frac{r^{2\phi\theta-1}(1-r)^{2\phi(1-\theta)-1}}{B(2\phi\theta, 2\phi(1-\theta))} \quad (1)$$

$B(\cdot)$  refers to the Beta function. A selective regime at stationarity is characterized by two parameters, a long-run average or ‘optimum’ in the adaptive landscape,  $\theta$ , and a precision,  $\phi$ , around the optimum. Greater values of  $\phi$  produce distributions that are more tightly constrained around the optimum.

If a trait evolves on an adaptive landscape with multiple peaks, then a model with multiple selective regimes should fit the data better than a model with a single regime [27, 5]. I used finite mixture model analysis (Text S4) to estimate the number of selective regimes. This approach differs from conceptually similar methods, but can be applied to non-Gaussian traits like SR (see [29, 30] for alternative methods with Gaussian traits). I inferred three selective regimes (Table 2), but note that the mapping between modes and regimes is not always one-to-one. In particular, one regime produces modes at both 0 and 1 (Fig. S1). Nevertheless, the data clearly support the large number of hypostomatous (SR = 0) species as a distinct mode

(Fig. S1). There was also strong support for an amphistomatous regime (compare Fig. S1A to Fig. S1B). Finally, the best-supported model also included a small mode for hyperstomatous species and a separate, smaller regime for species intermediate between hypo- and amphistomy (Fig. S1C).

The same general pattern seen at the global scale – multiple selective regimes leading to distinct modes – is recapitulated within nine of ten families best-represented in the global dataset (Fig. 2). Two regimes are supported in most (8 of 9) multi-regime families, except Asteraceae, in which three regimes are favoured (Fig. 2A). In one family, Rubiaceae, all species were inferred as members of a hypostomatous regime. In all multi-regime families except Poaceae, there are distinct regimes associated with hypo- and amphistomy; in Poaceae, there are hyper- and amphistomatous regimes instead (Fig. 2E). However, the hyperstomatous species of Poaceae in this study may not be representative of family since they are wetland specialists in the genus *Spartina* [31]. Generally, the internal (i.e. amphistomatous) mode is closely centered around 0.5, as predicted from biophysical theory [11, 13], except in the Rosaceae, where the inferred optimum is closer to 0.25. Although I was unable to account for phylogenetic nonindependence in these analyses (see Materials and Methods), that a similar pattern – species are either amphistomatous or hypo/hyperstomatous, but rarely intermediate – emerges independently in multiple families indicates the conclusions are unlikely to change qualitatively once fully phylogenetic methods can be extended to bounded traits. In summary, the apparent pattern of constraint on stomatal ratio is strikingly similar across multiple disparate families and at a global scale, suggesting convergent evolution because of shared phenotypic constraint.



## 140 Selection is sufficient to accommodate constraint

141 I analyzed a simple cost-benefit model of stomatal ratio to ask whether selection is  
 142 sufficient to account for apparent phenotypic constraint. Not surprisingly, selection  
 143 favours greater stomatal ratio ( $S_{\text{fit}}$ ) as the fitness benefit of greater photosynthesis  
 144 increases relative to the cost of upper stomata (Fig. 3A-C), but the shape of the  
 145 function is highly sensitive to one parameter in the model,  $\sigma^2$ . In particular, the  
 146 adaptive landscape goes from being smooth when  $\sigma^2$  is high to rugged when  $\sigma^2$  is  
 147 low (Fig. 3D-F). When the landscape is smooth, intermediate phenotypes between  
 148 complete hypostomy and amphistomy are best when the benefit:cost ratio itself is  
 149 intermediate. In contrast, when the landscape is rugged, intermediates are univer-  
 150 sally less fit than either of the boundary phenotypes. In a rugged landscape, as the  
 151 benefit:cost ratio decreases there is a sudden shift from amphistomy being favoured  
 152 to hypostomy being favoured. The dearth of species with intermediate  $SR$  in nature,  
 153 especially within families, therefore suggests that the adaptive landscape for stomatal  
 154 ratio is generally rugged. Numerical simulations based on smooth variation in the  
 155 benefit:cost ratio indicate that the simple, yet realistic assumptions of this model are  
 156 sufficient to generate qualitatively similar patterns of multimodality to those seen in  
 157 nature (Fig. 3G-H).

## 158 Growth form, leaf thickness, and precipitation shape stomatal 159 ratio evolution

160 If stomatal ratio is strongly associated with other traits or climatic factors, especially  
 161 if there are compelling *a priori* hypotheses (Table 1) supporting such associations,

then it suggests that trait variation is shaped by selection. Phylogenetic multiple regression consistently identified growth form and, to a lesser extent, leaf thickness and precipitation as the best predictors of stomatal ratio (Table 3). Amphistomy was strongly associated with fast growth forms (herbaceous plants), whereas hypostomy was most common in slower growing shrubs and trees (Fig. 4). As predicted by biophysical theory [11, 13], thicker leaves also tended to be amphistomatous, although the correlation was weak (Fig. S2A). Finally, amphistomy was more common in dry environments, whereas hypo/hyperstomy were associated with higher precipitation (Fig. S2B). Elevation and leaf area index, a proxy for open habitat, were not significantly associated with stomatal ratio in this dataset (Table 3). In single regressions, amphistomy was more common more open environments, as in previous studies [12, 18, 19, 21], but this correlation was not significant after precipitation was factored into multiple regression (precipitation and leaf area index are positively correlated).

## Discussion

Phenotypic evolution is often constrained, but the relative role of selective versus nonselective constraints is unclear. This study posits that multimodal traits reveal distinct peaks of high fitness in a rugged adaptive landscape. Hence, the prevalence of certain phenotypes and the dearth of others directly reflects selective constraints on phenotypic evolution. Evidence from a new, global dataset clearly shows that stomatal ratio is a multimodal trait (Fig. 1) and that multimodality has evolved repeatedly in land plants (Fig. 2). These patterns are difficult to reconcile with models omitting constraint, but are consistent with a rugged adaptive landscape

comprised of multiple selective regimes (Table 2). A simple cost-benefit model of stomatal ratio shows that selection is a sufficient explanation, particularly when the underlying adaptive landscape is predominantly rugged. Adaptive evolution from one peak in the landscape to another (i.e. hypo- to amphistomy or *vice versa*) appears to be primarily driven by growth form, suggesting that the fitness benefit of amphistomy – faster diffusion of CO<sub>2</sub> to chloroplasts – is greatest in species with ‘fast’ life histories.

## Multimodality implies constraint on the macroevolutionary adaptive landscape

Just as water is only found as ice, liquid, and steam, despite continuous variation in temperature, stomatal ratio comes in partially discrete clusters corresponding to hypo-, amphi-, and hyperstomy, but less often intermediate (Fig. 1). In fact, the modes identified here correspond remarkably with traditional botanical classifications [32], suggesting that these workers recognized the pattern even without quantitative analyses. The multimodal pattern in the dataset cannot be explained by an evolutionary process model neglecting constraint (Text S3). However, apparent clustering could occur by systematic underrepresentation of intermediate trait values [33] or nonrandom taxon sampling. It is highly improbable that intermediate phenotypes exist at greater frequency in nature but are rarely reported, as most studies have no *a priori* hypothesis about stomatal ratio in their study organisms. If anything, by omitting many studies that report only qualitative data, I might have enriched the frequency of intermediate phenotypes, as these are the most likely to be reported quantitatively. Nonrandom taxon sampling, without accounting for

208 phylogeny, could also give the appearance of multimodality. To give an extreme ex-  
 209 ample, if there had been a single transition from hypo- to amphistomy followed by  
 210 stasis, then sampling the tips of the phylogeny would produce a multimodal pattern  
 211 with apparently strong statistical support, even though it only represents a single  
 212 evolutionary event. Methodological limitations prevented me from fully accounting  
 213 for phylogeny (see Materials and Methods), but the fact that multimodality reap-  
 214 pears in multiple distantly-related families (Fig. 2) makes nonrandom taxon sampling  
 215 alone an unlikely explanation, though it might accentuate the pattern. Future work  
 216 is needed to extend regime-inference methods [27, 29, 30] to non-Gaussian traits, as  
 217 this study begins to do with a new evolutionary process model for proportion traits.

## 218 **Selection is the most likely explanation for phenotypic con-** 219 **straint**

220 In principle, constraint could reflect a mix of selective, genetic, developmental, and  
 221 functional factors [7]. However, the preponderance of available theory and data on  
 222 stomatal ratio suggests selection is responsible for most if not all of the phenotypic  
 223 constraint. Genetic, developmental, and functional constraints cannot explain the  
 224 dearth of intermediate phenotypes because intermediates are genetically accessible  
 225 as well as developmentally and functionally possible. The appropriate mutations  
 226 to generate intermediate phenotypes occur spontaneously during mutagenesis [34],  
 227 segregate among natural populations [35, 36, 37, 23], and are fixed between closely  
 228 related species [38, 24].

229 In contrast, the cost-benefit model presented here shows that with a small number

of realistic, evidence-based assumptions, selection is sufficient to accommodate the data and helps clarify why discrete modes form even when the underlying environmental gradients are smooth (environmental gradients need not be smooth, but it is unnecessary to assume otherwise). Stomata are often distributed equally on both surfaces (amphistomy) because this arrangement optimizes photosynthetic rate. This was an assumption of the model based on biophysical theory [11, 13]. More often, all stomata are on the lower surface because the costs of upper stomata outweigh the benefits. A dearth of intermediates between hypo- and amphistomy occurs when the landscape is rugged, making these phenotypes often fall in a fitness valley. However, the best mixture model includes a small peak of these intermediates (Table 2, Fig. S1). This suggests that although the adaptive landscape is constrained and often rugged, it may shift from rugged to smooth over macroevolutionary time. However, the fact that most species, especially within families (Fig. 2), cluster around particular modes suggests that the landscape is predominantly rugged. Finally, the small number of hyperstomatous species indicates that there are occasionally situations in which upper stomata are favoured, such as in aquatic plants or those with unusual epidermal or spongy mesophyll anatomy.

## **Life history, more than anatomy and climate, determines stomatal ratio**

Nonrandom association between stomatal ratio, other ecologically important traits, and climate also supports a significant role for selection in shaping trait evolution. To my knowledge, this is the first study to rigorously demonstrate a strong association between growth form and stomatal ratio, although it had been suggested by

earlier ecological surveys [15, 39]. Two hypotheses that might explain the relationship between growth form and stomatal ratio are: 1) herbaceous plants have shorter leaf lifespans [40], requiring higher photosynthetic rates to pay their construction costs in a shorter time [41]; 2) herbaceous plants have faster life histories, leading to stronger selection on high growth rates, mediated in part by higher leaf-level photosynthetic rate [42]. That the relationship between stomatal ratio and whole-plant lifespan holds within herbaceous (annuals vs. perennials) and woody (shrubs vs. trees), supports the second hypothesis (selection on faster life history favours amphistomy). Although this hypothesis requires further testing, if correct, it implies remarkably strong selection on leaf-level photosynthesis, as the photosynthetic advantage of amphistomy over hypostomy is only a few percent in a typical herbaceous leaf [11].

Surprisingly, I found little evidence supporting the most common adaptive explanation for amphistomy, that thicker leaves ‘need’ stomata on both sides to facilitate CO<sub>2</sub> diffusion [11]. In actuality, support for this hypothesis is mixed (Text S1), especially when phylogenetic nonindependence is taken into account [43, 39] (but see [44]). It is now clear why previous studies came to different conclusions: thicker leaves do tend to be amphistomatous, even once phylogeny is accounted for, but the trend is weak (Fig. S2A). Less powerful studies than this one could easily have failed to detect a significant relationship. Hence, leaf thickness, by constraining CO<sub>2</sub> diffusion, imposes selection for amphistomy. I also found that amphistomy was more common in plants from low precipitation environments. For a given stomatal conductance, which is proportional to evaporative water loss, amphistomy improves water-use efficiency by increasing photosynthetic rate [11], suggesting a plausible mechanism for selection on amphistomy in dry environments. Although low precipitation was cor-

related with habitat openness, measured using leaf area index, multiple phylogenetic regression indicated that precipitation was causal, in contrast to previous studies [18, 21]. These studies used finer scale (plant-level) descriptions of light environment that might have been missed by the coarser, satellite-based measurements of canopy cover used here. Alternatively, patterns at the global scale might differ from those within particular families or biomes. Finally, I was unable to test the effects of leaf orientation and stomatal packing on stomatal ratio, though these are likely to be important factors in many plants [20]. The evidence from this and previous studies shows that stomatal ratio is an ecologically relevant functional trait that could be valuable in physiological ecological and evolution [45].

That many ecologically important traits, like stomatal ratio, cluster around particular values but not others suggests pervasive constraint on phenotypic evolution. How can we seek a general explanation for this pattern when any particular instance requires specific mechanistic and ecological knowledge about a focal trait? For example, the emerging evidence from this and other recent studies on stomatal ratio (see especially [23]) is that peaks of high fitness are constrained by a tradeoff between photosynthetic rate and defence against foliar pathogens that preferentially infect though upper stomata. In particular, the cost-benefit model analyzed here predicts that even a small change in the fitness costs or benefits are sufficient to shift fitness peaks into qualitatively different selective regimes. If it is generally true that multimodal traits are associated with rapid regime shifts, then one way forward is to look for signatures of such shifts in closely-related species that sit astride different regimes. For example, one signature of regime shifts could be the presence of quantitative trait loci large enough to pass over valleys separating fitness peaks. Consistent with this, [24] recently identified two large effect loci that together are

capable of making a hypostomatous leaf amphistomatous, perhaps suggesting that these loci enabled a regime shift. Integrating comparative biology, mechanistic studies of organismal function, and the genetics of adaptation, as this and others studies [46] have begun to do, points to a general approach for evaluating the common features of macroevolutionary adaptive landscapes and, hence, the role of selection in constraining phenotypic evolution.

## Materials and Methods

### Assembling a comparative data set

**Stomatal ratio and leaf thickness** I collected quantitative data on stomatal ratio and leaf thickness from previously published studies (see Text S2 for full list of sources). These data are spread across a large and diverse literature, including functional ecology, taxonomy, agriculture, and physiology. Hence, neither a standardized nor exhaustive search was possible. I started by using Web of Knowledge to locate studies that cited seminal papers on the adaptive significance of amphistomy, specifically [11] and [12]. Once I found a paper with data, I examined papers that cited those ones. Finally, I found additional data sources in comprehensive reviews of plant anatomy [47, 32, 48]. For all data papers, I recorded the mean leaf thickness, abaxial (lower) and adaxial (upper) stomatal density for each species. Where only ranges were given, I used the midpoint. If the study included a treatment, I collected only data from the control treatment. If studies measured both juvenile and adult leaves, I used only adult leaves (no study reported only juvenile leaves). Usually data were given in a table, but occasionally I used ImageJ [49] to extract data



from figures or contacted authors for data. I only included data from studies that intentionally examined both surfaces for stomata; I excluded data from studies that described species categorically as “hypostomatous”, or “amphistomatous”, or “hyperstomatous”. Excluding qualitative data was necessary because there is no standard definition of “amphistomy” – it has sometimes been used to describe species that have approximately equal densities on each side [11] and at other times for species that have any stomata on the both surfaces [16, 15].

**Climate and elevation** Based on the *a priori* hypotheses, I extracted data on mean annual precipitation (average 1950 – 2000), elevation (Worldclim [50]), and light environment (average leaf area index between 1982 – 1998 based on remote sensing [51]). For light environment, I used a satellite indicator of leaf area index, the number of leaf layers between the ground and top of the canopy. Lower leaf area index is interpreted as a more open light environment. The strength of these global data sources is that I was able to obtain data for every species from the same dataset. A limitation of these data is that even the highest resolution ( $\approx 1$  km) data might miss important temporal and microsite variation. I discuss these limitations in light of the findings in the Discussion. For climate and elevation, geographic coordinates for each species are needed. For this, I downloaded all georeferenced herbarium specimens for a given species from GBIF (last accessed Jan 15–18, 2015) using the `occ_search` function in `rgbif` [52]. I filtered out or manually edited clearly erroneous locations (e.g.  $\text{lat} = 0$  or  $\text{lon} = 0$  or where  $\text{lat}$  and  $\text{lon}$  were clearly reversed). The mean and median number of GBIF georeferenced occurrences per species was 737 and 194, respectively. I calculated the trimmed-mean (10% trim) mean annual precipitation, elevation, and leaf area index to further remove specimens well outside the species’ range, possibly

349 because they were, say, misidentified, cultivated, or improperly georeferenced.

350 **Growth Form** I partitioned species by growth form into the following categories:  
 351 trees, small trees/shrubs, shrubs, and herbaceous species (forbs and grasses). Herba-  
 352 ceous species were further subdivided into annuals, biennials, and perennials. Species  
 353 that were variable or intermediate (e.g. annual/biennial, annual/perennial, bien-  
 354 nial/perennial, or annual/biennial/perennial) were classified as ‘biennial’. Subshrubs  
 355 with some woody growth were lumped with perennials rather than shrubs. Where  
 356 possible, I obtained growth form data from associated data papers. When this infor-  
 357 mation was not given, I used regional floras, supplemented by online trait databases  
 358 such as USDA Plants [53] and Encyclopedia of Life [54]. When these sources were  
 359 unavailable or ambiguous for a given species, I checked the primary taxonomic liter-  
 360 ature by searching the species name in Google Scholar.

361 **Taxonomic name resolution** I submitted taxonomic names in the database to  
 362 the Taxonomic Name Resolution Service (TNRS) [55]. I used names given by TNRS  
 363 when it returned an accepted name or synonym with overall score greater than  
 364 0.97 (scores are between 0 to 1). I scrutinized names where TNRS deemed the  
 365 name illegitimate, gave no opinion, or was otherwise ambiguous. At that point, I  
 366 consulted additional plant taxonomic repositories: The Plant List [56], International  
 367 Plant Names Index [57], and the Euro+Med PlantBase [58]. When no accepted  
 368 names were identified, I used original name given by the authors. For two very  
 369 recent papers [59, 60], I used the names given by those authors.

## 370 **Pattern to process: connecting multimodality to phenotypic** 371 **constraint**

372 Comparative methods often infer constraint by comparing the fit of evolutionary  
373 process models with and without constraint. Constraint, usually interpreted as a se-  
374 lective regime, is typically modelled as an Ornstein-Uhlenbeck process [28, 27, 5], but  
375 this model is inappropriate for proportion traits like stomatal ratio. I therefore devel-  
376 oped a new evolutionary process model that is analogous to an Ornstein-Uhlenbeck  
377 process except that traits are bounded by 0 and 1. A full description of model  
378 assumptions and a derivation of the stationary distribution under a given selective  
379 regime are available in Text S3. The key result is that a trait evolving under a single  
380 selective regime should conform to a Beta distribution at stationarity.

381 Multimodality suggests the presence of multiple selective regimes associated with  
382 different modes. I tested for multiple regimes using a conceptually similar but some-  
383 what different approach than previous studies. Current methods for inferring mul-  
384 tiple selective regimes are in their infancy [27, 29, 30] and cannot yet accommodate  
385 Beta-distributed traits because I could not obtain a general solution to the stochastic  
386 differential equation in Text S3. Future work is needed to develop numerical meth-  
387 ods, such as Approximate Bayesian Computation [61], to integrate the bounded  
388 Ornstein-Uhlenbeck process model elaborated here into existing statistical frame-  
389 works for multi-regime inference. However, a few lines of reasoning I discuss below  
390 indicate that the main conclusions of this study are robust.

391 I used finite mixture models to infer the number of selective regimes shaping  
392 stomatal ratio evolution (see [6] for a similar approach). That is, I assume the current

distribution of trait values across species can be represented as a mixture of multiple selective regimes at stationarity, each of which is modelled as a Beta-distributed variable. To fit models, I used an expectation-maximization algorithm to find the maximum likelihood mixture model from the data. A complete derivation of the likelihood function and a description of the fitting algorithm are given in Text S4. R code to implement the algorithm is available on Dryad [62]. I selected the best model using the more conservative Bayesian Information Criterion (BIC) to compensate for the fact that I am not accounting for phylogenetic nonindependence in this analysis (see below). I accepted models with an additional selective regime if they decreased BIC by 2 or more. By fitting the data to the stationary distribution, I implicitly assume that evolution is sufficiently rapid to ignore phylogenetic signal. Numerical simulations of the diffusion indicate that the transitory distribution is also Beta (data not shown), meaning that evidence for multiple regimes (i.e. a better fit of a mixture model with multiple Beta components) cannot be an artifact of transitory behaviour within a single regime. I also tested for multiple regimes within families where there was sufficient data ( $n \geq 15$ ). Ten families met this criterion. For each family, I compared the fit of mixtures with  $k = 1, 2$ , or 3 regimes, accepting models with an additional regime if they decreased BIC by 2 or more. Further, I rejected additional regimes supported by BIC if one of those regimes contained fewer than 3 species (this affected Poaceae and Salicaceae). Although testing for multiple regimes within families using the stationary distribution is an imperfect substitute for fitting the process model to the entire tree, it is nevertheless informative. If multiple regimes are found repeatedly in disparate families, this provides compelling evidence for convergent evolution because of phenotypic constraints imposed by similar adaptive landscapes.

## 418 Is selection sufficient to account for multimodality?

419 In this section, I use theory to ask under what conditions selection can explain the  
 420 rugged adaptive landscape implied by fitting the evolutionary process model to the  
 421 data. First, I ask whether a model with simple fitness costs and benefits of upper  
 422 stomata produces multiple fitness peaks (Text S1 discusses the fitness benefits and  
 423 costs associated with stomatal ratio). Next, I examine whether such a landscape  
 424 generates a trait distribution that qualitatively resembles the data, even when the  
 425 underlying environmental gradients are smooth. I specifically focus on the pattern  
 426 observed within families, where there was generally one mode of amphistomatous  
 427 species and another mode of hypostomatous species (hyperstomatous in the case of  
 428 Poaceae). I also opted to tradeoff the precision of a biophysical diffusion model for a  
 429 more general, albeit realistic, model with fewer parameters. Hence, the cost-benefit  
 430 model of stomatal ratio is true to the underlying physics but otherwise not strongly  
 431 dependent on specific assumptions. Future work will be needed to test if this more  
 432 general model is consistent with mechanistic biophysical models. The symbols used  
 433 in the model are summarized in Table 4.

434 I model selection on the logit of stomatal ratio (upper:total), which I denote  $S =$   
 435  $\text{logit}(SR) = \log(SR/(1-SR))$ , so that feasible trait variation ( $SR$  is constrained from  
 436 0 to 1) is continuous and unbounded. Fitness as a function of stomatal ratio depends  
 437 on the difference between the benefits ( $f(S)$ ) minus the costs ( $g(S)$ ). Therefore,  
 438 fitness as a function of stomatal ratio is:

$$W(S) = 1 + f(S) - g(S) \quad (2)$$

439 Based on biophysical theory [11, 13], I assume that there is an intermediate op-  
 440 timal stomatal ratio ( $S_{\text{opt}}$ ) at which photosynthetic rate is maximized. Above and  
 441 below that optimum, photosynthetic rate decreases, which I modelled as a Gaussian  
 442 function:

$$f(S) = B_{\text{max}} e^{-\frac{(S-S_{\text{opt}})^2}{2\sigma^2}} \quad (3)$$

443  $B_{\text{max}}$  defines the maximum fitness when  $S = S_{\text{opt}}$ .  $\sigma^2$  acts akin to a shape factor  
 444 when the function is viewed from a logit scale. When  $\sigma^2$  is large, the benefit function  
 445 has an inverted-U shape. There are increasing returns to fitness of the first few upper  
 446 stomata, but diminishing returns to further increases in SR (Fig. 3A). In contrast,  
 447 when  $\sigma^2$  is small, the benefit function is more bell-shaped; the fitness benefit of the  
 448 first few upper stomata is large, but with diminishing returns (Fig. 3C).

449 I assumed a linear cost (e.g. increased susceptibility to foliar pathogens [23]) for  
 450 each additional upper stomate. The total cost as a function of stomatal ratio is the  
 451 product of the total stomatal density, the stomatal ratio (upper:total density), and  
 452 the cost per upper stomate. I define the slope of the cost function as  $C_{\text{max}}$ , which is  
 453 equal to the total stomatal density times the cost per upper stomate:

$$h(SR) = C_{\text{max}} SR \quad (4)$$

454 On a logit scale, the total cost asymptotically approaches  $C_{\text{max}}$ :

$$g(S) = \frac{C_{\max}}{1 + e^{-S}} \quad (5)$$

If more were known about the cost of having upper stomata, a more realistic model could be constructed. Without such knowledge, I believe it is judicious to start with the simplest model that makes few assumptions and therefore could apply to a large number of particular underlying mechanisms. Substituting Eqs 3 and 5 into Eq 2, fitness as a function of  $S$  is:

$$W(S) = 1 + B_{\max} e^{-\frac{(S-S_{\text{opt}})^2}{2\sigma^2}} - \frac{C_{\max}}{1 + e^{-S}} \quad (6)$$

Note that if the cost function were applied to lower rather than upper stomata, as might be the case for specialized taxa such as aquatic plants, then one could obtain the same results, except that hyper- rather than hypostomy would prevail, as in the Poaceae data. The fitness function is maximized where the marginal benefit of the next upper stomate is equal to the marginal cost:

$$\frac{df(S)}{dS} = \frac{dg(S)}{dS} \quad (7)$$

I did not obtain an analytical solution, so instead I used the optim function in R [63] to numerically solve for the stomatal ratio that maximized fitness ( $S_{\text{fit}}$ ) under varying ratios of fitness cost ( $C_{\max}$ ) to benefit ( $B_{\max}$ ). I tuned the benefit:cost ratio by fixing  $B_{\max}$  to 1 and varying  $C_{\max}$  between 0.01 and 100. I also varied the shape factor  $\sigma^2$  between 0.1 and 10, which appeared to capture the full range of relevant model behaviour. For all numerical solutions, I assumed that the optimal

471 stomatal ratio for photosynthesis was 0.5, hence  $S_{\text{opt}} = 0$  on a logit scale. Next,  
 472 I generated hypothetical trait distributions under a scenario where the benefit:cost  
 473 ratio varies uniformly from  $10^{-2}$  to  $10^2$ . I solved for  $S_{\text{fit}}$  with  $10^4$  evenly spaced  
 474 values of  $B_{\text{max}} : C_{\text{max}}$  under low, medium, and high values of  $\sigma^2$ . R code for finding  
 475 numerical solutions is available from Dryad [62].

## 476 **Testing adaptive hypotheses for stomatal ratio using phyloge-** 477 **netic regression**

478 I tested for an association between stomatal ratio, leaf thickness, mean annual pre-  
 479 cipitation, elevation, leaf area index, and growth form using type 2 phylogenetic  
 480 ANOVA with both categorical (Growth form) and continuous (e.g. leaf thickness)  
 481 predictor variables. For this analysis I quantified stomatal ratio as  $\min(\text{upper den-}$   
 482  $\text{sity, lower density}) : \max(\text{upper density, lower density})$ . In this form, stomatal ratio  
 483 equals 1 when the densities on each surface are the same, and goes to 0 as the distri-  
 484 bution become more asymmetrical (hypostomy or hyperstomy). Note that this form  
 485 differs from what I use in analyzing multimodality because I wanted to specifically  
 486 test which factors favour the photosynthetically optimal distribution (amphistomy)  
 487 versus suboptimal distributions (either hypo- or hyperstomy). I accounted for phy-  
 488 logeny using a Phylomatic [64] megatree for this relatively large and phylogenet-  
 489 ically extensive dataset. To examine whether results were robust to phylogenetic  
 490 correction, I analyzed the data using three methods: Brownian motion (high phy-  
 491 logenetic signal), Pagel's  $\lambda$  (intermediate phylogenetic signal), and no phylogenetic  
 492 signal (normal ANOVA). For the intermediate signal model, I estimated Pagel's  $\lambda$   
 493 using maximum likelihood. Phylogenetic models were fit using phylogenetic least



squares in the R package ‘caper’ [65]. The trait dataset and phylogeny used in these analyses are available on Dryad [62].

## Acknowledgements

Ranessa Cooper, Jenny Read, Gregory Jordan, and Tim Brodribb generously made data available. Members of the Angert and Schluter labs provided feedback on an earlier version of this manuscript. I am supported by a Biodiversity Postdoctoral Fellowship funded by NSERC-CREATE.

## 501 Figures

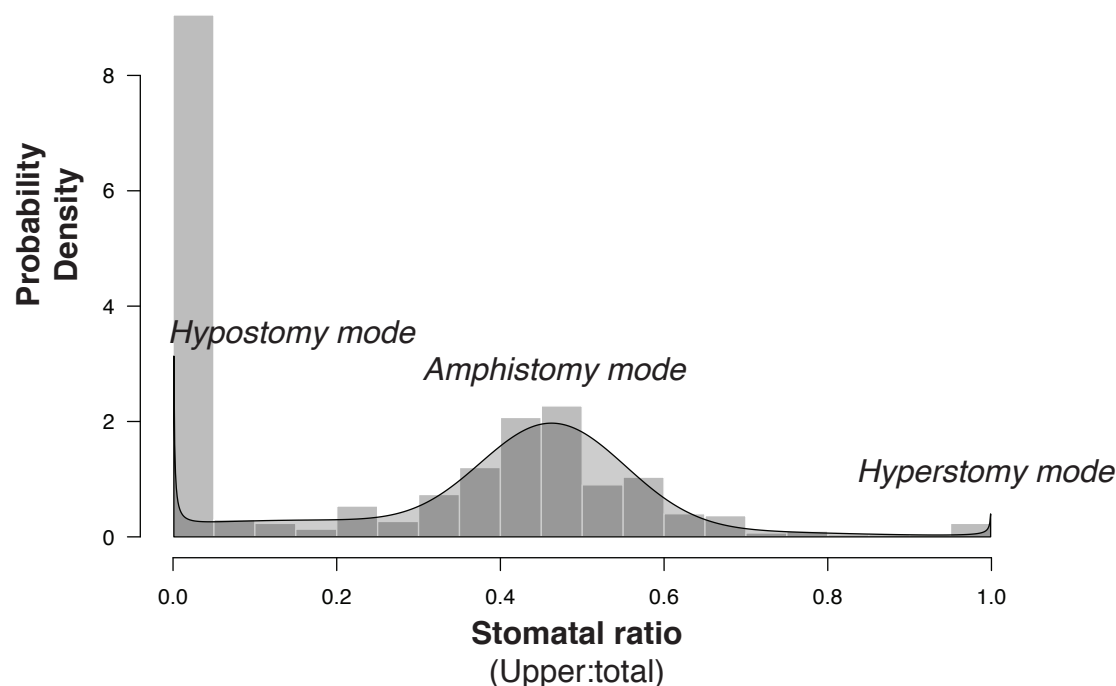

**Fig. 1. Stomatal ratio is a multimodal trait.** A density histogram of stomatal ratio across 599 species (light grey bars in background) displays three noticeable modes. The plurality of species are completely hypostomatous (all stomata on the lower surface; stomatal ratio equals zero). There is a smaller, broader mode of amphistomatous species (approximately equal density of stomata on upper and lower surfaces; stomatal ratio equals approximately one-half). Finally, there are a small number of hyperstomatous species (all stomata on the upper surface; stomatal ratio equals one). A mixture of selective regimes (shaded grey polygon) manifests these three modes, indicating that they are real features of constrained trait evolution rather than random noise.

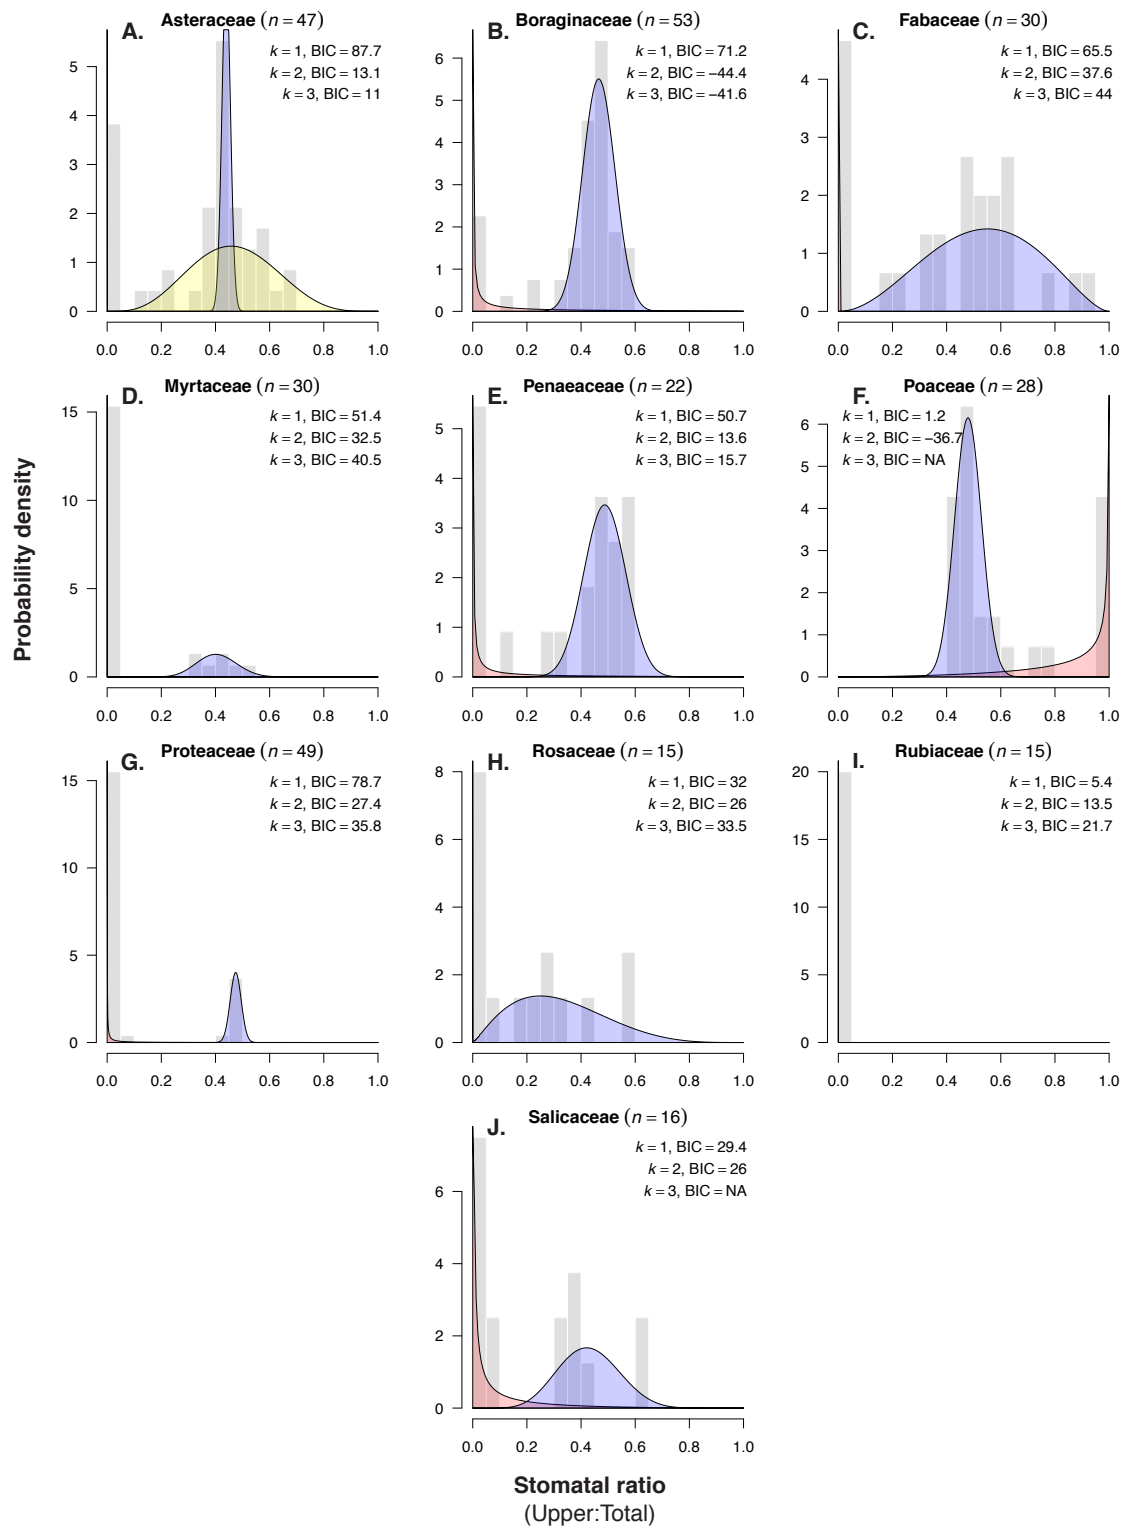

**Fig. 2. Repeated evolution of multimodality suggests that the adaptive landscape is conserved across land plants.** Shaded polygons of inferred regimes are plotted atop a histogram (grey bar) of stomatal ratio from a given plant family (grey bars). Note that some distributions are very narrow spikes near the origin. The title gives the family name and number of species sampled  $n$  from that family. Three regimes were inferred for Asteraceae (panel **A.**); two regimes were inferred for other families except the Rubiaceae (panels **B.-J.**). The number of regimes was inferred from information theoretic comparisons of finite mixture models with Beta-distributed components. The Bayesian Information Criterion (BIC) for models with  $k = 1, 2$ , and 3 components is given in the top. I accepted models with additional regimes (higher  $k$ ) if they decreased BIC by two or more. In Poaceae and Salicaceae, I rejected models with  $k = 3$  because some components had very low membership.

*Fitness as a function of stomatal ratio*

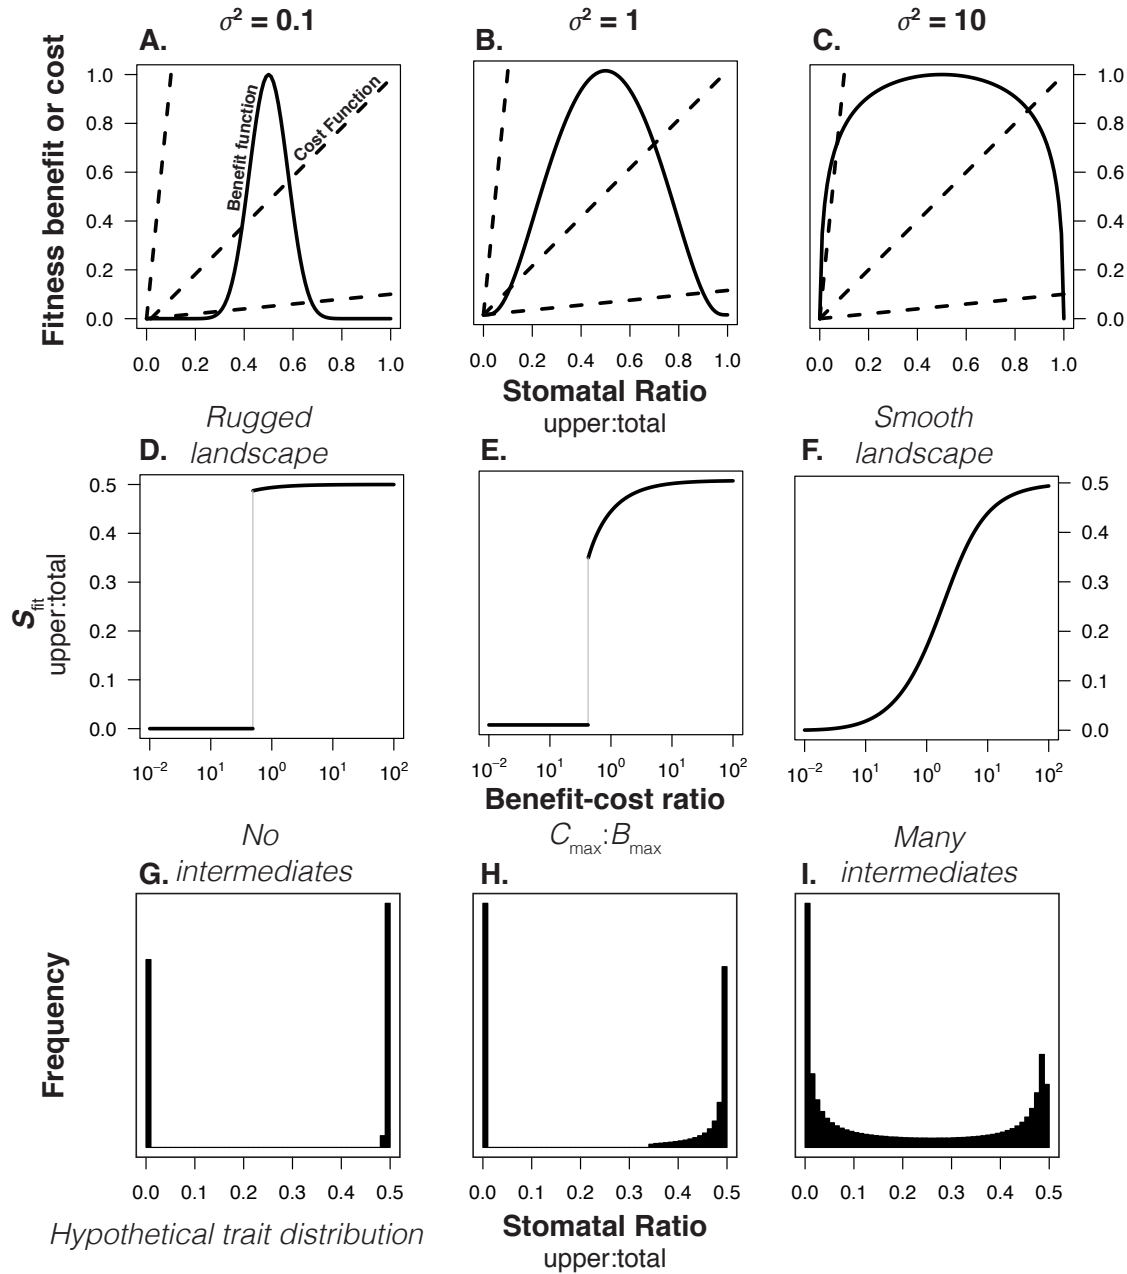

**Fig. 3. Selection is sufficient to explain why intermediate phenotypes are universally unfit and the adaptive landscape is rugged.** Panels **A.-C.**: In each panel, a benefit function (solid line, see Eq 3) is shown with three different cost functions (dashed line, see Eq 5 ). In all panels,  $B_{\max}$  is fixed at 1 and three slopes of the cost function,  $C_{\max}$  are illustrated: 0.1 (shallow slope), 1 (medium slope), and 10 (steep slope). The fitness benefit is always maximized when stomatal ratio is 0.5 (amphistomy), corresponding to  $S_{\text{opt}} = 0$  on a logit scale. The shape factor  $\sigma^2$  changes the benefit function from bell-shaped in **A.** to an inverted-U shape in **C.** Panels **D.-F.** show that the shape of the benefit function affects the topography of the adaptive landscape. Solid lines are the stomatal ratio that optimizes fitness ( $S_{\text{fit}}$ ) as a function of the benefit:cost ratio ( $B_{\max} : C_{\max}$ ). When the benefits are high compared to costs, amphistomy (stomatal ratio = 0.5) is favoured; when the costs are high, hypostomy is favoured (stomatal ratio = 0). However, the transition between these extremes can be abrupt when the landscape is rugged (panel **D.**) or gradual when the landscape is smooth (panel **F.**). The light gray line indicates the range of universally unfit phenotypes. Panels **G.-I.** show hypothetical trait distributions assuming that the benefit:cost ratio varies uniformly from  $10^{-2}$  to  $10^2$ . Histograms were generated by solving for  $S_{\text{fit}}$  with  $10^4$  evenly spaced values of  $B_{\max} : C_{\max}$ . Note that the trait values range from hypostomatous to amphistomatous (stomatal ratio = 0.5), but a mirror image distribution with hyperstomatous species would be seen if fitness costs accrued to lower stomata.

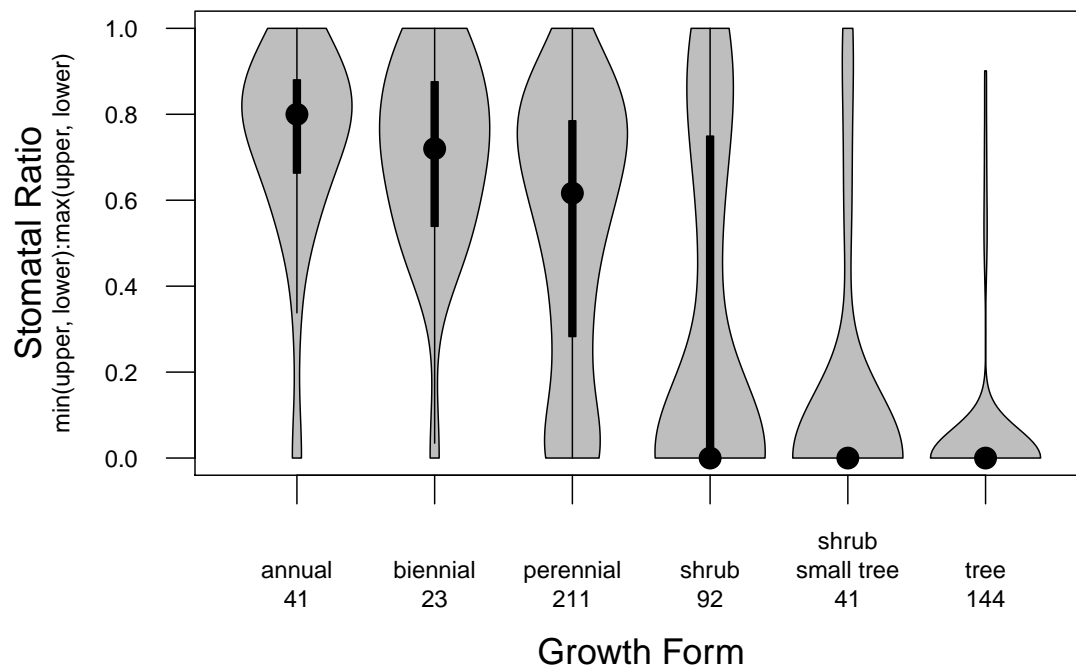

**Fig. 4. Association between amphistomy and fast growth forms points to selection on life history shaping stomatal ratio evolution.** The violin plot shows of stomatal ratio as a function of growth form across all species in the dataset. The width of the grey polygons indicates the density of data. Length of grey polygon indicate the range of the data; the point indicates the median; the thick lines indicate the 0.25 and 0.75 quantiles. Sample sizes per growth form in the dataset are given below the label.



## 502 Tables

**Table 1. Adaptive hypotheses and predictions for stomatal ratio.** The first and second columns indicate the hypothesized ecological factors and the predicted direction of association with amphistomy, respectively. References to key studies are provided, but see Text S1 for additional detail.

| Hypothesized factor | Predicted association with amphistomy | References   |
|---------------------|---------------------------------------|--------------|
| Leaf thickness      | thicker leaves                        | [11]         |
| Light               | greater light intensity               | [71, 12, 21] |
| Precipitation       | lower precipitation                   | [17, 19]     |
| Altitude            | higher altitude                       | [73, 74, 75] |
| Growth form         | herbaceous growth form                | [15, 39]     |

**Table 2. Multiple selective regimes are manifest in a multimodal trait distribution.** Models with multiple components ( $k$ ) corresponding to distinct selective regimes under a bounded Ornstein-Uhlenbeck process fit the data significantly better than models with a single regime (lower Bayesian Information Criterion [BIC]). In particular, the model with with three regimes is much more strongly supported than models with one or two regimes (see Fig. S1 for a visual representation of regimes). A mixture of multiple regimes, in turn, gives rise to a multimodal distribution with hypo-, amphi-, and hyperstomatous modes. For a given mixture, each of  $k$  regimes is represented as a component  $i$  parameterized by the strength of constraint ( $\phi_i$ ) around the long-term average ( $\theta_i$ ) and a mixture weight  $w_i$ .

| $k$ | Parameters       |                   |              | log-likelihood | df | BIC    |
|-----|------------------|-------------------|--------------|----------------|----|--------|
| 1   | $\phi_1 = 0.4$   | $\theta_1 = 0.17$ | $w_1 = 1$    | -604           | 2  | 1220.9 |
| 2   | $\phi_1 = 0.25$  | $\theta_1 = 0.04$ | $w_1 = 0.52$ | -252.5         | 5  | 536.9  |
|     | $\phi_2 = 9.98$  | $\theta_2 = 0.46$ | $w_2 = 0.48$ |                |    |        |
| 3   | $\phi_1 = 0.16$  | $\theta_1 = 0.02$ | $w_1 = 0.47$ | -237.7         | 8  | 526.6  |
|     | $\phi_2 = 17.24$ | $\theta_2 = 0.47$ | $w_2 = 0.38$ |                |    |        |
|     | $\phi_3 = 2.04$  | $\theta_3 = 0.35$ | $w_3 = 0.16$ |                |    |        |
| 4   | $\phi_1 = 6.99$  | $\theta_1 = 0$    | $w_1 = 0.44$ | -235.6         | 11 | 541.6  |
|     | $\phi_2 = 1.6$   | $\theta_2 = 0.35$ | $w_2 = 0.17$ |                |    |        |
|     | $\phi_3 = 16.85$ | $\theta_3 = 0.47$ | $w_3 = 0.38$ |                |    |        |
|     | $\phi_4 = 181.8$ | $\theta_4 = 0.99$ | $w_4 = 0$    |                |    |        |

**Table 3. Growth form, anatomy, and precipitation jointly determine stomatal ratio.** Three models with varying levels of phylogenetic signal (Brownian motion [top], Pagel’s  $\lambda$  [middle], and nonphylogenetic [bottom]) identify growth form, leaf thickness, and mean annual precipitation as significantly associated with stomatal ratio.

| Stomatal Ratio $\sim$                      | df | SS     | MS    | F     | $P$                    |
|--------------------------------------------|----|--------|-------|-------|------------------------|
| <i>Brownian Motion</i>                     |    |        |       |       |                        |
| log(Leaf Thickness)                        | 1  | 0.017  | 0.017 | 20.31 | $8.08 \times 10^{-6}$  |
| Mean Annual Precipitation                  | 1  | 0.021  | 0.021 | 24.11 | $1.21 \times 10^{-6}$  |
| Elevation                                  | 1  | 0      | 0     | 0.08  | 0.78                   |
| Leaf Area Index                            | 1  | 0      | 0     | 0.05  | 0.82                   |
| Growth Form                                | 5  | 0.039  | 0.008 | 9.06  | $2.74 \times 10^{-8}$  |
| <i>Pagel’s <math>\lambda = 0.64</math></i> |    |        |       |       |                        |
| log(Leaf Thickness)                        | 1  | 0.008  | 0.008 | 24.38 | $1.05 \times 10^{-6}$  |
| Mean Annual Precipitation                  | 1  | 0.009  | 0.009 | 26.03 | $4.67 \times 10^{-7}$  |
| Elevation                                  | 1  | 0      | 0     | 0.26  | 0.61                   |
| Leaf Area Index                            | 1  | 0      | 0     | 0     | 1                      |
| Growth Form                                | 5  | 0.027  | 0.005 | 15.52 | $2.77 \times 10^{-14}$ |
| <i>Nonphylogenetic</i>                     |    |        |       |       |                        |
| log(Leaf Thickness)                        | 1  | 2.376  | 2.376 | 31.67 | $2.94 \times 10^{-8}$  |
| Mean Annual Precipitation                  | 1  | 1.711  | 1.711 | 22.81 | $2.31 \times 10^{-6}$  |
| Elevation                                  | 1  | 0.009  | 0.009 | 0.12  | 0.72                   |
| Leaf Area Index                            | 1  | 0.031  | 0.031 | 0.41  | 0.52                   |
| Growth Form                                | 5  | 15.897 | 3.179 | 42.38 | $7.36 \times 10^{-37}$ |

**Table 4. Glossary of symbols used in the cost-benefit model.**

| Symbol           | Description                                                                 |
|------------------|-----------------------------------------------------------------------------|
| $SR$             | Stomatal ratio: ratio of upper to total stomatal density                    |
| $S$              | logit of stomatal ratio ( $SR$ )                                            |
| $S_{\text{opt}}$ | Stomatal ratio (logit scale) that maximizes fitness benefits                |
| $B_{\text{max}}$ | Maximum fitness benefit when $S = S_{\text{opt}}$                           |
| $\sigma^2$       | Shape factor of benefit function                                            |
| $C_{\text{max}}$ | Maximum fitness cost of when all stomata are on the upper side ( $SR = 1$ ) |
| $S_{\text{fit}}$ | Stomatal ratio maximizes fitness (benefits minus costs)                     |

# References

- [1] Simpson GG (1944) Tempo and mode in evolution. New York: Columbia University Press.
- [2] Raduski AR, Haney EB, Igić B (2012) The expression of self-incompatibility in angiosperms is bimodal. *Evolution* 66: 1275–1283.
- [3] Martin R, MacLarnon A (1985) Gestation period, neonatal size and maternal investment in placental mammals. *Nature* 313: 220–223.
- [4] Fenster CB, Armbruster WS, Wilson P, Dudash MR, Thomson JD (2004) Pollination syndromes and floral specialization. *Annual Review of Ecology, Evolution, and Systematics* : 375–403.
- [5] Mahler DL, Ingram T, Revell LJ, Losos JB (2013) Exceptional convergence on the macroevolutionary landscape in island lizard radiations. *Science* 341: 292–295.
- [6] Scheffer M, Vergnon R, Cornelissen JHC, Hantson S, Holmgren M, et al. (2014) Why trees and shrubs but rarely trubs? *Trends in Ecology & Evolution* 29: 433–434.
- [7] Arnold SJ (1992) Constraints on phenotypic evolution. *American Naturalist* 140: S85–S107.
- [8] Barton N, Partridge L (2000) Limits to natural selection. *BioEssays* 22: 1075–1084.

- 523 [9] Gould SJ (2002) The Structure of Evolutionary Theory. Cambridge, MA:  
524 Harvard University Press.
- 525 [10] Kimball S, Gremer JR, Huxman TE, Venable DL, Angert AL (2013) Pheno-  
526 typic selection favors missing trait combinations in coexisting annual plants.  
527 The American Naturalist 182: 191–207.
- 528 [11] Parkhurst DF (1978) The adaptive significance of stomatal occurrence on one  
529 or both surfaces of leaves. The Journal of Ecology 66: 367–383.
- 530 [12] Mott KA, Gibson AC, O’Leary JW (1984) The adaptive significance of am-  
531 phistomatic leaves. Plant, Cell & Environment 5: 455–460.
- 532 [13] Gutschick VP (1984) Photosynthesis model for C<sub>3</sub> leaves incorporating CO<sub>2</sub>  
533 transport, propagation of radiation, and biochemistry 2. ecological and agri-  
534 cultural utility. Photosynthetica 18: 569–595.
- 535 [14] Parkhurst DF, Mott KA (1990) Intercellular diffusion limits to CO<sub>2</sub> uptake in  
536 leaves studied in air and helox. Plant Physiology 94: 1024–1032.
- 537 [15] Salisbury E (1927) On the causes and ecological significance of stomatal fre-  
538 quency, with special reference to the woodland flora. Philosophical Transac-  
539 tions of the Royal Society of London Series B 216: 1–65.
- 540 [16] Leick E (1927) Untersuchungen über den Einfluß des Lichtes auf die  
541 öffnungsweite unterseitiger und oberseitiger Stomata desselben Blattes.  
542 Jahrbücher für Wissenschaftliche Botanik 67: 771–848.
- 543 [17] Wood JG (1934) The physiology of xerophytism in Australian plants: the  
544 stomatal frequencies, transpiration and osmotic pressures of sclerophyll and

- 545        tomentose-succulent leaved plants. *Journal of Ecology* 22: 69–87.
- 546    [18] Fitter A, Peat H (1994) The ecological flora database. *Journal of Ecology* 82:  
547        415–425.
- 548    [19] Gibson AC (1996) *Structure-Function Relations of Warm Desert Plants*. Berlin:  
549        Springer-Verlag.
- 550    [20] Smith WK, Bell DT, Shepherd KA (1998) Associations between leaf structure,  
551        orientation, and sunlight exposure in five Western Australian communities.  
552        *American Journal of Botany* 85: 51–63.
- 553    [21] Jordan GJ, Carpenter RJ, Brodribb TJ (2014) Using fossil leaves as evidence  
554        for open vegetation. *Palaeogeography, Palaeoclimatology, Palaeoecology* 395:  
555        168–175.
- 556    [22] Howell JT (1945) Concerning stomata on leaves in *Arctostaphylos*. *The Was-*  
557        *mann Collector* 6: 57–65.
- 558    [23] McKown AD, Guy RD, Quamme L, Klápště J, La Mantia J, et al. (2014)  
559        Association genetics, geography and ecophysiology link stomatal patterning in  
560        *Populus trichocarpa* with carbon gain and disease resistance trade-offs. *Molec-*  
561        *ular Ecology* 23: 5771–5790.
- 562    [24] Muir CD, Pease JB, Moyle LC (2014) Quantitative genetic analysis indicates  
563        natural selection on leaf phenotypes across wild tomato species (*Solanum* sect.  
564        *Lycopersicon*; Solanaceae). *Genetics* 198: 1629–1643.
- 565    [25] Lyshede OB (2002) Comparative and functional leaf anatomy of selected Al-  
566        stromeriaceae of mainly Chilean origin. *Botanical Journal of the Linnean*

Society 140: 261–272.

[26] Baum DA, Larson A (1991) Adaptation reviewed: a phylogenetic methodology for studying character macroevolution. *Systematic Biology* 40: 1–18.

[27] Butler M, King AA (2004) Phylogenetic comparative analysis: a modeling approach for adaptive evolution. *The American Naturalist* 164: 683–695.

[28] Hansen TF (1997) Stabilizing selection and the comparative analysis of adaptation. *Evolution* 51: 1341–1351.

[29] Ingram T, Mahler DL (2013) Surface: detecting convergent evolution from comparative data by fitting ornstein-uhlenbeck models with stepwise akaike information criterion. *Methods in Ecology and Evolution* 4: 416–425.

[30] Uyeda JC, Harmon LJ (2014) A novel bayesian method for inferring and interpreting the dynamics of adaptive landscapes from phylogenetic comparative data. *Systematic Biology* 64: 902–918.

[31] Maricle BR, Koteyeva NK, Voznesenskaya EV, Thomasson JR, Edwards GE (2009) Diversity in leaf anatomy, and stomatal distribution and conductance, between salt marsh and freshwater species in the  $C_4$  genus *Spartina* (Poaceae). *New Phytologist* 184: 216–233.

[32] Metcalfe CR, Chalk L (1950) *Anatomy of the dicotyledons*, Vols. 1 & 2. Oxford: Oxford University Press, first edition.

[33] McGlone MS, Richardson SJ, Jordan GJ, Perry GL (2015) Is there a ‘‘suboptimal’’ woody species height? a response to Scheffer et al. *Trends in Ecology & Evolution* 30: 4–5.



- 589 [34] Dow GJ, Bergmann DC, Berry JA (2014) An integrated model of stomatal  
590 development and leaf physiology. *New Phytologist* 201: 1218–1226.
- 591 [35] Hall N, Griffiths H, Corlett J, Jones H, Lynn J, et al. (2005) Relationships  
592 between water-use traits and photosynthesis in *Brassica oleracea* resolved by  
593 quantitative genetic analysis. *Plant Breeding* 124: 557–564.
- 594 [36] Rae AM, Ferris R, Tallis MJ, Taylor G (2006) Elucidating genomic regions de-  
595 termining enhanced leaf growth and delayed senescence in elevated CO<sub>2</sub>. *Plant,*  
596 *Cell & Environment* 29: 1730–1741.
- 597 [37] Gailing O, Langenfeld-Heyser R, Polle A, Finkeldey R (2008) Quantitative trait  
598 loci affecting stomatal density and growth in a quercus robur progeny: impli-  
599 cations for the adaptation to changing environments. *Global Change Biology*  
600 14: 1934–1946.
- 601 [38] Chitwood DH, Kumar R, Headland LR, Ranjan A, Covington MF, et al. (2013)  
602 A quantitative genetic basis for leaf morphology in a set of precisely defined  
603 tomato introgression lines. *The Plant Cell* 25: 2465–2481.
- 604 [39] Peat H, Fitter A (1994) Comparative analyses of ecological characteristics of  
605 British angiosperms. *Biological Reviews* 69: 95–115.
- 606 [40] Wright IJ, Reich PB, Cornelissen JH, Falster DS, Garnier E, et al. (2005)  
607 Assessing the generality of global leaf trait relationships. *New Phytologist* 166:  
608 485–496.
- 609 [41] Reich PB, Wright IJ, Cavender-Bares J, Craine J, Oleksyn J, et al. (2003)  
610 The evolution of plant functional variation: traits, spectra, and strategies.

- 611 International Journal of Plant Sciences 164: S143–S164.
- 612 [42] Field C, Mooney HA (1986) The photosynthesis-nitrogen relationship in wild  
613 plants. In: Givnish TJ, editor, On the Economy of Plant Form and Function,  
614 Cambridge: Cambridge University Press. pp. 25–56.
- 615 [43] Beerling DJ, Kelly CK (1996) Evolutionary comparative analyses of the rela-  
616 tionship between leaf structure and function. New Phytologist 134: 35–51.
- 617 [44] Muir CD, Hangarter RP, Moyle LC, Davis PA (2014) Morphological and  
618 anatomical determinants of mesophyll conductance in wild relatives of tomato  
619 (*Solanum* sect. *Lycopersicon*, sect. *Lycopersicoides*; solanaceae). Plant, Cell &  
620 Environment 37: 1415–1426.
- 621 [45] Pérez-Harguindeguy N, Díaz S, Garnier E, Lavorel S, Poorter H, et al. (2013)  
622 New handbook for standardised measurement of plant functional traits world-  
623 wide. Australian Journal of Botany 61: 167–234.
- 624 [46] Heckmann D, Schulze S, Denton A, Gowik U, Westhoff P, et al. (2013) Pre-  
625 dicting C<sub>4</sub> photosynthesis evolution: modular, individually adaptive steps on  
626 a Mount Fuji fitness landscape. Cell 153: 1579–1588.
- 627 [47] Napp-Zinn K (1970) Anatomie des blattes. Berlin: Borntraeger.
- 628 [48] Metcalfe CR, Chalk L (1979) Anatomy of the dicotyledons, Vols. 1 & 2. Oxford:  
629 Clarendon Press, second edition.
- 630 [49] Abràmoff MD, Magalhães PJ, Ram SJ (2004) Image processing with imagej.  
631 Biophotonics International 11: 36–42.

- [50] Hijmans RJ, Cameron SE, Parra JL, Jones PG, Jarvis A (2005) Very high resolution interpolated climate surfaces for global land areas. *International Journal of Climatology* 25: 1965–1978.
- [51] Los SO (2010) ISLSCP II FASIR-adjusted NDVI, 1982-1998. volume 10.
- [52] Chamberlain S, Ram K, Barve V, Mcglinn D (2014) rgbif: Interface to the Global Biodiversity Information Facility API. URL <https://github.com/ropensci/rgbif>. R package version 0.7.8.99.
- [53] USDA, NRCS (2014). The plants database. Available: <http://www.plants.usda.gov>.
- [54] (2015). Encyclopedia of Life. Available: <http://www.eol.org>.
- [55] Boyle B, Hopkins N, Lu Z, Garay JAR, Mozzherin D, et al. (2013) The taxonomic name resolution service: an online tool for automated standardization of plant names. *BMC bioinformatics* 14: 16.
- [56] The Plant List (2013). Version 1.1. Available: <http://www.theplantlist.org/>.
- [57] (2015). The International Plant Names Index. Available: <http://www.ipni.org>.
- [58] (2015). Euro+Med Plantbase. Available: <http://www.emplantbase.org>.
- [59] Brodribb TJ, Jordan GJ, Carpenter RJ (2013) Unified changes in cell size permit coordinated leaf evolution. *New Phytologist* 199: 559–570.
- [60] Giuliani R, Koteyeva N, Voznesenskaya E, Evans MA, Cousins AB, et al. (2013) Coordination of leaf photosynthesis, transpiration, and structural traits in rice and wild relatives (genus *Oryza*). *Plant Physiology* 162: 1632–1651.

- [61] Csilléry K, Blum MG, Gaggiotti OE, François O (2010) Approximate bayesian computation (abc) in practice. *Trends in Ecology & Evolution* 25: 410–418.
- [62] Muir CD (2015) Data from: Selection constrains phenotypic evolution in a functionally important plant trait, Dryad Digital Repository. URL <http://dx.doi.org/10.5061/dryad.21bm5>.
- [63] R Core Team (2013) R: A Language and Environment for Statistical Computing. R Foundation for Statistical Computing, Vienna, Austria. URL <http://www.R-project.org/>.
- [64] Webb CO, Donoghue MJ (2005) Phylomatic: tree assembly for applied phylogenetics. *Molecular Ecology Notes* 5: 181–183.
- [65] Orme CDL, Freckleton RP, Thomas GH, Petzoldt T, Fritz SA, et al. (2013) caper: Comparative Analyses of Phylogenetics and Evolution in R. URL <http://CRAN.R-project.org/package=caper>. R package version 0.5.2.
- [66] James SA, Bell DT (2001) Leaf morphological and anatomical characteristics of heteroblastic *Eucalyptus globulus* ssp. *globulus* (myrtaceae). *Australian Journal of Botany* 49: 259–269.
- [67] Burrows G (2001) Comparative anatomy of the photosynthetic organs of 39 xeromorphic species from subhumid New South Wales, Australia. *International Journal of Plant Sciences* 162: 411–430.
- [68] Williams M, Woodward FI, Baldocchi DD, Ellsworth DS (2004) CO<sub>2</sub> capture: Leaf to landscape. In: Smith WK, Vogelmann TC, Critchley C, editors, *Photosynthetic Adaptation*, New York: Springer. pp. 133–168.

- [69] Goble-Garratt E, Bell D, Loneragan W (1981) Floristic and leaf structure patterns along a shallow elevational gradient. *Australian Journal of Botany* 29: 329–347.
- [70] Poorter H, Niinemets Ü, Walter A, Fiorani F, Schurr U (2010) A method to construct dose–response curves for a wide range of environmental factors and plant traits by means of a meta-analysis of phenotypic data. *Journal of Experimental Botany* 61: 2043–2055.
- [71] Lohr PL (1919) Untersuchungen über die Blattantomie von Alpen- und Ebenenpflanzen. Ph.D. thesis, Universität Basel.
- [72] Mott KA, O’Leary JW (1984) Stomatal behavior and CO<sub>2</sub> exchange characteristics in amphistomatous leaves. *Plant physiology* 74: 47–51.
- [73] Spinner H (1936) Stomates et altitude. *Berichte der Schweizerischen Botanischen Gesellschaft* 46: 12–27.
- [74] Woodward FI (1986) Ecophysiological studies on the shrub *Vaccinium myrtillus* L. taken from a wide altitudinal range. *Oecologia* 70: 580–586.
- [75] Körner C, Neumayer M, Menendez-Riedl SP, Smeets-Scheel A (1989) Functional morphology of mountain plants. *Flora* 182: 353–383.
- [76] Vogel S (2012) *The Life of a Leaf*. Chicago: University of Chicago Press.
- [77] Franks PJ, Beerling DJ (2009) Maximum leaf conductance driven by CO<sub>2</sub> effects on stomatal size and density over geologic time. *Proceedings of the National Academy of Sciences* 106: 10343–10347.

- [78] Foster J, Smith W (1986) Influence of stomatal distribution on transpiration in low-wind environments. *Plant, Cell & Environment* 9: 751–759.
- [79] Gates FC (1914) Winter as a factor in the xerophily of certain evergreen ericads. *Botanical Gazette* 57: 445–489.
- [80] Pospíšilová J, Solárová J (1984) Environmental and biological control of diffusive conductances of adaxial and abaxial leaf epidermes. *Photosynthetica* 18: 445–453.
- [81] Smith W (1981) Temperature and water relation patterns in subalpine understory plants. *Oecologia* 48: 353–359.
- [82] Reich P (1984) Relationships between leaf age, irradiance, leaf conductance, CO<sub>2</sub> exchange, and water-use efficiency in hybrid poplar. *Photosynthetica* 18: 445–453.
- [83] Smith WK, McClean TM (1989) Adaptive relationship between leaf water repellency, stomatal distribution, and gas exchange. *American Journal of Botany* 76: 465–469.
- [84] Boeger MRT, Gluезak RM (2006) Adaptações estruturais de sete espécies de plantas para as condições ambientais da área de dunas de Santa Catarina, Brasil. *Iheringia, Série Botânica* 61: 73–82.
- [85] Camargo MAB, Marengo RA (2011) Density, size and distribution of stomata in 35 rainforest tree species in Central Amazonia. *Acta Amazonica* 41: 205–212.

- 717 [86] Cooper RL, Cass DD (2003) A comparative epidermis study of the Athabasca  
718 sand dune willows (*Salix*; Salicaceae) and their putative progenitors. Canadian  
719 Journal of Botany 81: 749–754.
- 720 [87] Cooper RL, Ware JV, Cass DD (2004) Leaf thickness of *Salix* spp. (Salicaceae)  
721 from the Athabasca sand dunes of northern Saskatchewan, Canada. Canadian  
722 Journal of Botany 82: 1682–1686.
- 723 [88] Dickie J, Gasson P (1999) Comparative leaf anatomy of the Penaeaceae and  
724 its ecological implications. Botanical Journal of the Linnean Society 131: 327–  
725 351.
- 726 [89] Dunbar-Co S, Sporck MJ, Sack L (2009) Leaf trait diversification and design  
727 in seven rare taxa of the Hawaiian *Plantago* radiation. International Journal  
728 of Plant Sciences 170: 61–75.
- 729 [90] Fahmy GM (1997) Leaf anatomy and its relation to the ecophysiology of some  
730 non-succulent desert plants from Egypt. Journal of Arid Environments 36:  
731 499–526.
- 732 [91] Fahmy GM, Hegazy AK, Ali MIA, Gomaa NH (2007) Structure-function rela-  
733 tions of leaves in 24 species of winter and summer weeds. Global Journal of  
734 Environmental Research 1: 103–116.
- 735 [92] Fontenelle G, Costa C, Machado R (1994) Foliar anatomy and micromorphol-  
736 ogy of eleven species of *Eugenia* L.(Myrtaceae). Botanical Journal of the Lin-  
737 nean Society 116: 111–133.
- 738 [93] Holbrook NM, Putz F (1996) From epiphyte to tree: differences in leaf structure

- 739 and leaf water relations associated with the transition in growth form in eight  
740 species of hemiepiphytes. *Plant, Cell & Environment* 19: 631–642.
- 741 [94] Loranger J, Shipley B (2010) Interspecific covariation between stomatal density  
742 and other functional leaf traits in a local flora. *Botany* 88: 30–38.
- 743 [95] Malaisse F, Colonval-Elenkov E (1982) On the leaf anatomy of trees and shrubs  
744 of the montane evergreen forest of Malawi and Zimbabwe. *Geo-Eco-Trop* 6:  
745 139–160.
- 746 [96] Parkin J, Pearson HHW (1903) The botany of the Ceylon patanas. *Journal of*  
747 *the Linnean Society of London, Botany* 35: 430–463.
- 748 [97] Peace W, Macdonald F (1981) An investigation of the leaf anatomy, foliar  
749 mineral levels, and water relations of trees of a Sarawak forest. *Biotropica* :  
750 100–109.
- 751 [98] Rao AN, Tan H (1980) Leaf structure and its ecological significance in certain  
752 mangrove plants. In: Soepadmo E, Rap AN, MacIntosh DJ, editors, *Pro-*  
753 *ceedings of the Asian Symposium on Mangrove Environment: Research and*  
754 *Management*, Ardyas. pp. 183–194.
- 755 [99] Read J, Edwards C, Sanson GD, Aranwela N (2000) Relationships between  
756 sclerophylly, leaf biomechanical properties and leaf anatomy in some Australian  
757 heath and forest species. *Plant Biosystems* 134: 261–277.
- 758 [100] Ridge R, Loneragan W, Bell D, Colquhoun I, Kuo J (1984) Comparative studies  
759 in selected species of *Eucalyptus* used in rehabilitation of the northern Jarrah



- 760 forest, Western Australia. ii. wood and leaf anatomy. Australian Journal of  
761 Botany 32: 375–386.
- 762 [101] Selvi F, Bigazzi M (2001) Leaf surface and anatomy in Boraginaceae tribe  
763 Boragineae with respect to ecology and taxonomy. Flora 196: 269–285.
- 764 [102] Seshavatharam V, Srivalli M (1989) Systematic leaf anatomy of some Indian  
765 mangroves. Proceedings of the Indian Academy of Sciences: Plant Sciences 99:  
766 557–565.
- 767 [103] Sobrado M, Medina E (1980) General morphology, anatomical structure, and  
768 nutrient content of sclerophyllous leaves of the “Bana” vegetation of  
769 Amazonas. Oecologia 45: 341–345.
- 770 [104] Hansen TF (2012) Adaptive landscapes and the comparative analysis of adap-  
771 tation. In: Svensson E, Calsbeek R, editors, The Adaptive Landscape in Evo-  
772 lutionary Biology, Oxford, UK: Oxford University Press. pp. 205–226.
- 773 [105] Pennell MW, Harmon LJ (2013) An integrative view of phylogenetic compar-  
774 ative methods: connections to population genetics, community ecology, and  
775 paleobiology. Annals of the New York Academy of Sciences 1289: 90–105.
- 776 [106] Otto SP, Day T (2007) A Biologist’s Guide to Mathematical Modeling in Ecol-  
777 ogy and Evolution. Princeton, New Jersey: Princeton University Press.
- 778 [107] Grün B, Kosmidis I, Zeileis A (2012) Extended beta regression in R: Shaken,  
779 stirred, mixed, and partitioned. Journal of Statistical Software 48: 1–25.

## 780 Supporting Information

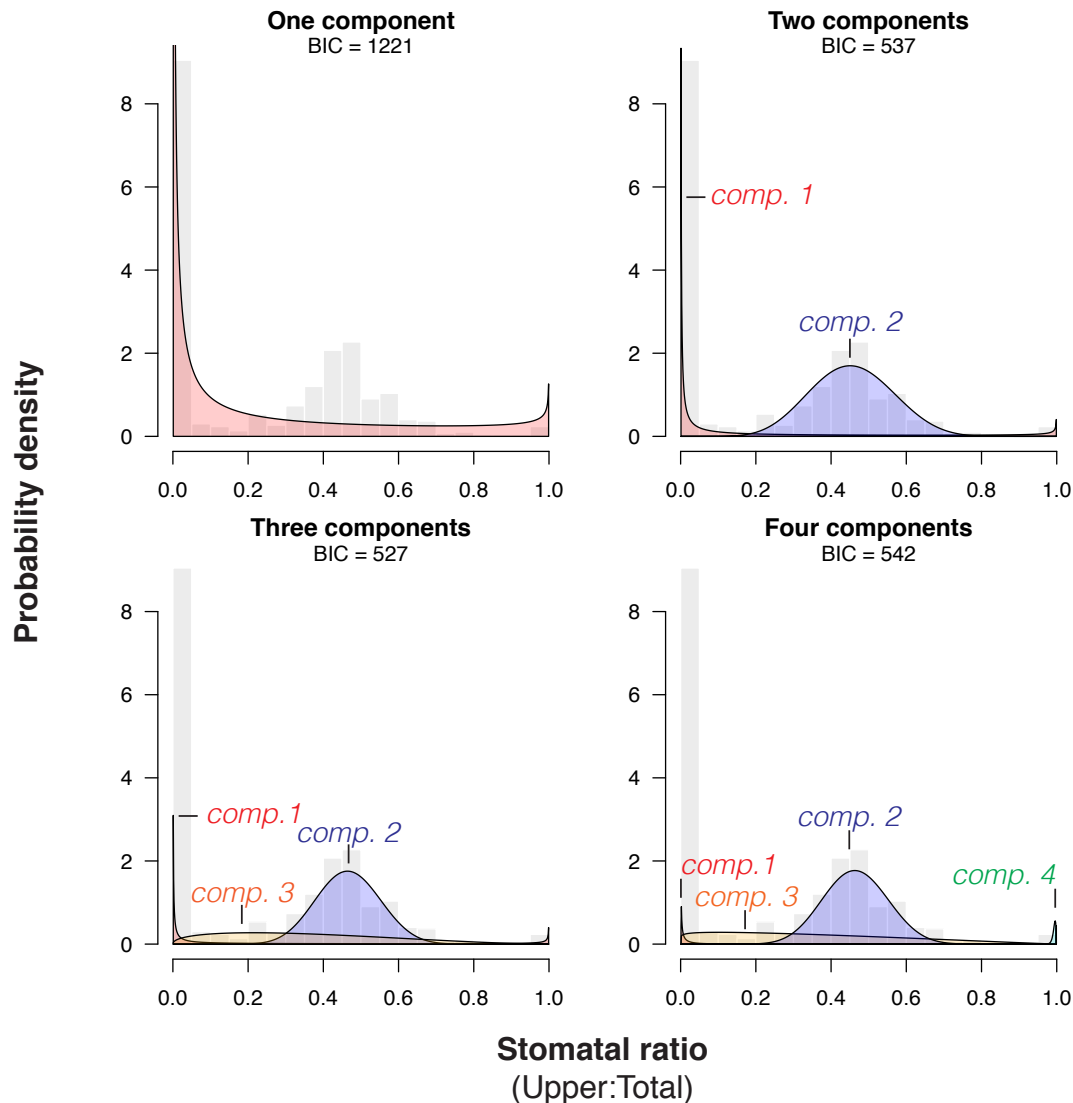

**Fig. S1. A multimodal trait distribution implies multiple selective regimes.** Model selection using Bayesian Information Criterion (BIC) favoured models that were mixtures of composed multiple selective regimes. **A.** A model with one component was a poor fit because it cannot account for the large peak of amphistomatous species. **B.** A model with two components fit the data much better because it incorporates separate selective regimes for amphistomatous species (blue polygon) and hypo-/hyperstomatous species (red polygon). **C.** An additional selective regime (orange polygon) for species with stomatal ratios between 0 and 0.5 improved model fit, suggesting that intermediate phenotypes are favoured in some circumstances. **D.** Finally, a model with a fourth component (green polygon) did not significantly improve the fit (higher BIC).

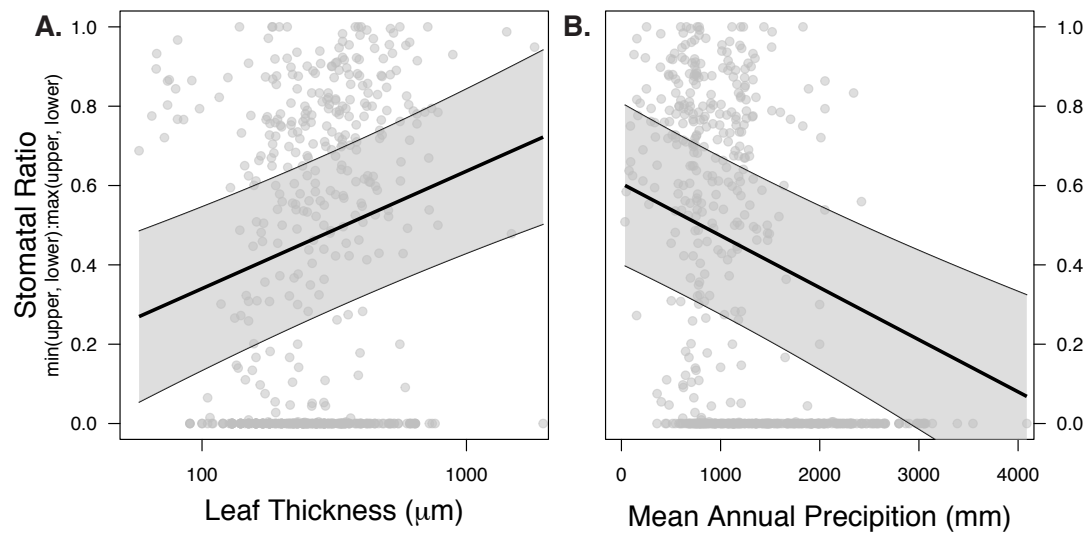

**Fig. S2. Amphistomy is weakly associated with thicker leaves and drier habitats.** Each point represents a species from the global dataset. The thick line and gray polygon are the median and 95% confidence intervals from the posterior distribution of predicted stomatal ratio as a function of leaf thickness based on phylogenetic regression. The fitted lines and confidence intervals are drawn with growth form set to perennial and other continuous predictor variables set to their median.

## 781 **Text S1: Hypothesized benefits and costs of amphis-** 782 **tomy**

783 There are at least seven viable, non-mutually exclusive hypotheses for on the adaptive  
784 significance of amphistomy, five of which I evaluate here.

### 785 **H1: Leaf thickness**

786 The most widely cited and frequently tested diffusional limitation hypothesis is that  
787 amphistomy is adaptive in thick leaves. Models [11, 13] and experiments [14] demon-  
788 strate that the path length from substomatal cavities to chloroplasts can impose a  
789 large constraint on photosynthesis, especially when leaf thickness exceeds approx-  
790 imately 300  $\mu\text{m}$ . Several studies have found a positive correlation between leaf  
791 thickness and amphistomy [11, 20, 66, 67, 68, 59, 44], but the evidence is equiv-  
792 ocal [69, 12, 43].

### 793 **H2: Light**

794 A second hypothesis is that amphistomy is favoured in high light, open environments  
795 because  $\text{CO}_2$  becomes more limiting at high irradiance. H1 and H2 are difficult to  
796 disentangle, and could even reinforce one another, because leaf thickness increases  
797 under high irradiance [70]. However, several studies have argued that the light en-  
798 vironment, rather than leaf thickness, is the primary factor affecting selection on  
799 amphistomy [19, 71, 18, 12, 20, 21].

### 800 **H3: Precipitation**

801 Wood [17] observed that amphistomy was common in Australian deserts. Although  
802 amphistomy is sometimes common in dry environments, most studies conclude that  
803 precipitation is indirectly correlated with amphistomy because drier habitats also  
804 tend to be more open [19, 21]. Nevertheless, the fact that amphistomy can increase  
805 water-use efficiency [11, 72] suggests that it might be favoured in dry habitats, inde-  
806 pendent of other factors.

### 807 **H4: Altitude**

808 Anatomical surveys demonstrate that amphistomy is sometimes more common in  
809 high elevation communities compared to nearby low elevation communities [73, 74,  
810 75], possibly because lower CO<sub>2</sub> partial pressures place a greater premium on effi-  
811 cient diffusion. However, this hypothesis is complicated by the fact that diffusion  
812 coefficients are higher at elevation because the air is thinner [76], meaning that CO<sub>2</sub>  
813 diffusion could actually be less limiting.

### 814 **H5: Growth form**

815 Independent of leaf anatomy and the abiotic environment, the strength of selection  
816 on photosynthetic rate might be stronger among certain growth forms (e.g. forbs  
817 vs. trees) because of their different life history strategies. Salisbury (1927) noted  
818 qualitatively that herbs tended to amphistomatous, an observation later confirmed  
819 by Peat and Fitter (1994). However, other reviews have argued that stomatal ratio

is not closely connected with any particular growth form [32, 12].

Two hypotheses I have not considered because of methodological limitations are that amphistomy is associated with vertically-oriented, isobilateral leaves [32] and that amphistomy, by doubling the conductive leaf surface area, relieves a constraint the stomatal size-density tradeoff [77, 59]. I did not have sufficient, reliable information on leaf orientation and guard cell size to evaluate these hypotheses.

## Costs of upper stomata

This study reaffirms at a global scale that most species are hypostomatous. The most parsimonious explanation for the preponderance of hypostomy is that there is cost to having stomata on the upper surface of the leaf. A fitness cost associated with increased evaporation [78] cannot explain the dearth of stomata on the upper leaf surface, though this explanation occasionally appears in the literature [79]. In fact, amphistomy is common in some dry habitats [17, 11, 19, 20] and amphistomatous plants can be functionally hypostomatous when stressed by regulating stomatal aperture differentially on each surface [80, 81, 82, 72]. Although amphistomatous plants can be functionally hypostomatous, the reverse is not true. Hence, anatomical amphistomy should be favoured whenever the capacity to be functionally amphistomatous is advantageous.

Besides evaporation, several fitness costs have been suggested, including decreased water-use efficiency of amphistomy in large leaves [11], photodamage to guard cell chloroplasts (W.K. Smith, pers. comm.), occlusion of upper stomata by water blockage [83], and increased susceptibility to foliar pathogens [13]. Increased evaporation

842 is an unlikely explanation since so many desert species are anatomically amphis-  
 843 tomatous (see above), but to my knowledge, most other hypotheses have not been  
 844 rigorously tested. However, [23] showed that adaxial (upper) stomata pore area, but  
 845 not abaxial (lower) pore area, was strongly correlated with susceptibility to a rust  
 846 pathogen. Hence, the pathogen susceptibility hypothesis is best supported by the  
 847 current data.



## 848 Text S2: Data Sources

- 849 1. Boeger and Gluzezak 2006 [84]
- 850 2. Brodribb *et al.* 2013 [59]
- 851 3. Camargo and Marengo 2011 [85]
- 852 4. Cooper and Cass 2003 [86]; Cooper *et al.* 2004 [87]
- 853 5. Dickie and Gasson 1999 [88]
- 854 6. Dunbar-Co *et al.* 2009 [89]
- 855 7. Fahmy 1997 [90]
- 856 8. Fahmy *et al.* 2007 [91]
- 857 9. Fontenelle *et al.* 1994 [92]
- 858 10. Giuliani *et al.* 2013 [60]
- 859 11. Holbrook and Putz 1996 [93]
- 860 12. Körner *et al.* 1989 [75]
- 861 13. Lohr 1919 [71]
- 862 14. Loranger and Shipley 2010 [94]
- 863 15. Malaisse and Colonval-Elenkov 1982 [95]
- 864 16. Maricle *et al.* 2009 [31]

- 865 17. Muir *et al.* 2014 [44]
- 866 18. Parkin and Pearson 1903 [96]
- 867 19. Peace and MacDonald 1981 [97]
- 868 20. Rao and Tan 1980 [98]
- 869 21. Reed *et al.* 2000 [99]
- 870 22. Ridge *et al.* 1984 [100]
- 871 23. Selvi and Bigazzi 2001 [101]
- 872 24. Seshavatharam and Srivalli 1989 [102]
- 873 25. Sobrado and Medina 1980 [103]

## 874 Text S3: An evolutionary process model for propor- 875 tion traits

876 Making evolutionary sense of a biological pattern requires an underlying process  
877 model to provide the theoretical foundation on which data analysis rests. A powerful  
878 approach in macroevolution involves modelling trait evolution on adaptive landscapes  
879 where the peaks of high fitness evolve with or without constraint [28, 104, 105]. If  
880 models with constraint describe the data better than those without, then there is  
881 compelling evidence that the adaptive landscape is shaped by some combination of  
882 selective, genetic, functional, or developmental constraints. Furthermore, the adap-  
883 tive landscape may change under multiple selective regimes, meaning that a trait  
884 is best described by a mixture of distributions, each generated under separate se-  
885 lective regimes [27, 29, 30]. Current evolutionary process models such as Brownian  
886 motion and Ornstein-Uhlenbeck assume that traits follow a Gaussian distribution,  
887 but this is clearly inappropriate for traits like stomatal ratio. In this text, I modify  
888 previous evolutionary process models to accommodate proportion traits and derive  
889 the expected pattern given adaptive landscapes that are constrained versus those  
890 that are unconstrained. This model provides a strong theoretical foundation for the  
891 model-based statistical inference described in Text S4. A glossary of symbols used  
892 in this text are provided in Table S1.

893 In both models with and without constraint, I assume that *total* stomatal density  
894 follows a random walk over macroevolutionary time, though the exact process is  
895 irrelevant here. Imagine for a set area ( $A_{\text{leaf}}$ ) of leaf (e.g.  $1 \mu\text{m}^2$ ) there are  $N_T(t) =$   
896  $A_{\text{leaf}}D_T(t) = A_{\text{leaf}}(D_U(t) + D_L(t))$ , where  $N_T(t)$  is the total number of stomata in

**Table S1. Glossary of symbols used in process models of stomatal trait evolution.**

| Symbol            | Description                                                                                                              |
|-------------------|--------------------------------------------------------------------------------------------------------------------------|
| $r$               | Stomatal ratio: ratio of upper to total stomatal density                                                                 |
| $N_T, N_U, N_L$   | Number of stomata in a focal leaf area $A_L$<br>The total number $N_T$ is the sum of upper $N_U$ and lower $N_L$ stomata |
| $D_T, D_U, D_L$   | Density of stomata in total, upper, and lower surfaces                                                                   |
| $A_{\text{leaf}}$ | Focal leaf area                                                                                                          |
| $\nu$             | Diffusion coefficient of stomatal ratio                                                                                  |
| $\theta$          | Long-run average stomatal ratio                                                                                          |
| $\alpha$          | Return rate to long-run average ratio                                                                                    |
| $\phi$            | Defined as $\nu\alpha$                                                                                                   |
| $M_{\delta x}$    | Drift function of stomatal ratio $r$ in diffusion approximation                                                          |
| $V_{\delta x}$    | Diffusion function of stomatal ratio $r$ in diffusion approximation                                                      |

that area at time  $t$ . Total stomatal number  $N_T(t)$  is the sum of upper ( $N_U(t)$ ) and lower ( $N_L(t)$ ) stomata. Let  $\Delta N_{T,t} = N_T(t+1) - N_T(t)$  be the change in total stomatal number that must be made up of changes in upper stomata, lower stomata, or some combination of both. I assume that the contribution to  $\Delta N_{T,t}$  from upper and lower stomata is proportional to their density. For reasons explained below, I define  $\nu = N_T(t+1)$  as the total stomata at time  $t+1$ . The transition rate  $u_{ij}$  from  $N_U = i$  upper stomata at time  $t$  to  $N_U = j$  upper stomata at time  $t+1$  is binomially distributed with a rate determined by the stomatal ratio  $r$ :

$$u_{ij} = \binom{\nu}{j} r^j (1-r)^{\nu-j} \quad j \in \{0, 1, 2, \dots, \nu\} \quad (\text{S1})$$

Note that stomatal ratio here is defined as the proportion of upper stomata,  $r = N_U/(N_U + N_L) = N_U/N_T = N_U/\nu$ . The mean and variance of stomatal ratio in the next time step is therefore:

$$\mu(r) = \mathbb{E} \left[ \frac{N_U}{\nu} \right] = r \quad (\text{S2})$$

$$\sigma^2(r) = \mathbb{E} \left[ \left( \frac{N_U}{\nu} \right)^2 \right] - \left( \mathbb{E} \left[ \frac{N_U}{\nu} \right] \right)^2 = \frac{r(1-r)}{\nu} \quad (\text{S3})$$

908 In other words, the average stomatal ratio does not change, but the variance  
 909 increases each time step. When  $\nu$  is large, the distribution can be approximated with  
 910 a normal distribution and a diffusion approximation can be used to model the long  
 911 term evolution of the trait. This diffusion process is analogous to Brownian motion,  
 912 except that the trait is bounded by 0 and 1. It is also mathematically equivalent  
 913 to one-locus, two-allele population genetic models of neutral evolution (see [106] for  
 914 a detailed derivation). I will make reference to results from this literature without  
 915 rigorously deriving them here. In particular, it has been shown that the stationary  
 916 distribution of the diffusion is:

$$f(r) = \frac{e^{A(r)} (c_1 \int e^{-A(r)} dr + c_2)}{V_{\delta x}} \quad (\text{S4})$$

917 where

$$A(r) = \int \frac{2M_{\delta x}}{V_{\delta x}} dr \quad (\text{S5})$$

$$M_{\delta x} = 0 \quad (\text{S6})$$

$$V_{\delta x} = \frac{r(1-r)}{\nu} \quad (\text{S7})$$

and the time scale is in units of  $\nu^{-1}$ . Thus,  $\nu$  can be interpreted as a diffusion coefficient without necessarily specifying a genetic or developmental mechanism that governs the amount of variance in stomatal ratio from one time to the next. Solving for  $f(r)$  without selection on stomatal ratio yields:

$$f(r) = \frac{6}{r(1-r)} \quad (\text{S8})$$

Thus, without selection on stomatal ratio, most species should be hypo- or hyper-stomatous (Fig. S3). Next, I modify the model to include stabilizing selection around a long-run average  $\theta$ , which may be interpreted as a peak in the adaptive landscape under a single selective regime. This process model is analogous to an Ornstein-Uhlenbeck process for a bounded trait. I again use the diffusion approximation, but this time the drift and diffusion coefficients are:

$$M_{\delta x} = \alpha(\theta - r) \quad (\text{S9})$$

$$V_{\delta x} = \frac{r(1-r)}{\nu} \quad (\text{S10})$$

$\alpha$  is the return rate to  $\theta$ . Greater values of  $\alpha$  constrain trait variation more tightly around  $\theta$ . With these coefficients and setting the first constant of integration  $c_1$  to 0 yields:

$$f(r) = c_2 \nu r^{2\alpha\nu\theta-1} (1-r)^{2\alpha\nu(1-\theta)-1} \quad (\text{S11})$$

931 where:

$$c_2 = 1 / \int_0^1 \nu r^{2\alpha\nu\theta-1} (1-r)^{2\alpha\nu(1-\theta)-1} dr \quad (\text{S12})$$

$$= \frac{1}{\nu B(2\alpha\nu\theta, 2\alpha\nu(1-\theta))} \quad (\text{S13})$$

932  $B(\cdot)$  is the beta function. Setting  $c_1$  to 0 can be justified by recognizing that the  
 933 distribution should be symmetrical ( $x = 1 - x$ ) when  $\theta = 0.5$ , which only occurs if  
 934  $c_1 = 0$  (S.P. Otto pers. comm.). Further, I confirmed the accuracy of the analytically-  
 935 derived stationary distribution using stochastic simulations (data not shown).

936 Defining  $\phi = \alpha\nu$ , the stationary distribution simplifies somewhat to:

$$f(r) = \frac{r^{2\phi\theta-1} (1-r)^{2\phi(1-\theta)-1}}{B(2\phi\theta, 2\phi(1-\theta))} \quad (\text{S14})$$

937 This is the  $\text{Beta}(\alpha, \beta)$  distribution with  $\alpha = 2\phi\theta$  and  $\beta = 2\phi(1-\theta)$ . Note that,  
 938 following standard notation,  $\alpha$  here refers to the first shape parameter of the Beta  
 939 distribution, not the constraint factor of the evolutionary process model. This result  
 940 means that the well-known statistical properties of the Beta distribution can be  
 941 leveraged to understand the stationary distribution of a proportion trait under a  
 942 constrained adaptive landscape. For example, the Beta distribution takes on a variety  
 943 of shapes that begin to resemble the distribution of proportional traits like stomatal  
 944 ratio (Fig. S4). Hence, the evolutionary process model developed here provides

945 a strong theoretical justification for fitting the stomatal ratio data to a mixture of  
946 Beta distributions in order to infer the selective regimes shaping this trait across plant  
947 species. Although I have derived the model with stomatal ratio in mind, it should  
948 be applicable to wide variety of proportional traits evolving under a constrained  
949 adaptive landscape.



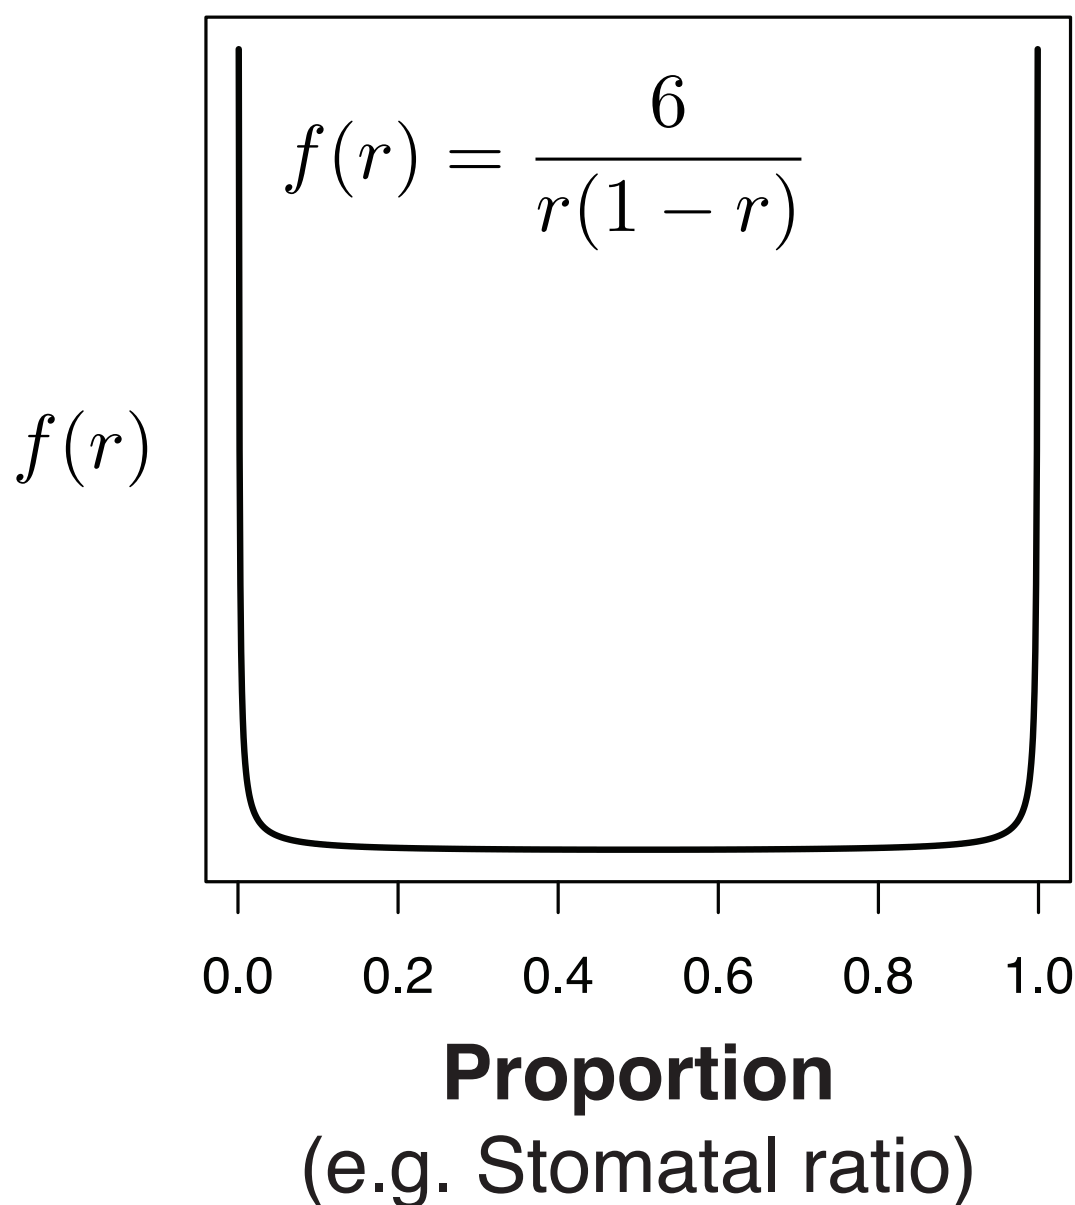

Fig. S3. Without constraint, a proportion trait like stomatal ratio ( $r$ ) will evolve toward a distribution in which most species are 0 or 1.

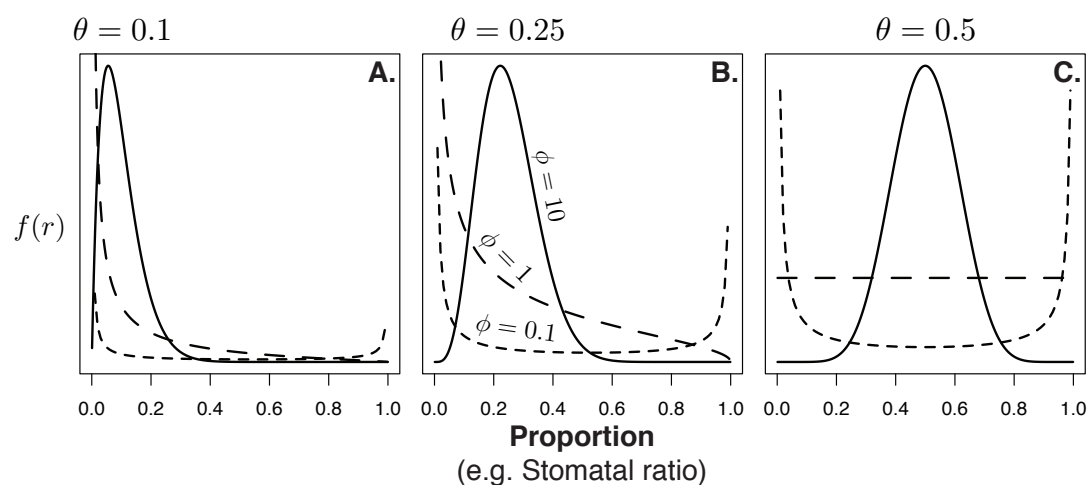

**Fig. S4. A proportion trait like stomatal ratio evolving under a constrained adaptive landscape is Beta distributed.** The Beta distribution can take on a wide variety of shapes depends on the long-run average  $\theta$  and the levels of constraint  $\phi$  (greater  $\phi$  equals greater constraint).

# 950 Text S4: Fitting evolutionary process to pattern us- 951 ing finite mixture models estimated with maximum 952 likelihood

953 In this paper, I infer the number of selective regimes acting on stomatal ratio by  
954 fitting a mixture of stationary distributions derived from the process model above to  
955 the data. In this section I derive the likelihood functions and describe an expectation-  
956 maximization algorithm to find the maximum likelihood mixture model given the  
957 data. R code to implement these methods is available on Dryad [62]. In general,  
958 finite mixture distributions are the summation of  $k \geq 2$  mixture components (i.e.  
959 probability distributions) with density  $f_i(x)$  and mixture weight  $w_i$ :

$$g(x; k) = \sum_{i=1}^k w_i f_i(x) \quad (\text{S15})$$

960 Here the  $i$ -th mixture component has a probability density  $f_i(x)$  given by the  
961 stationary distribution in Eq S14 with parameters  $\theta_i, \phi_i$ . The likelihood of a mixture  
962 distribution given  $k$  mixture components and a data vector  $\mathbf{x}$  with sample size  $n$  is  
963 the weighted sum of the likelihoods of each component:

$$\mathcal{L}(\mathbf{w}, \boldsymbol{\phi}, \boldsymbol{\theta}; \mathbf{x}, k) = \sum_{i=1}^k w_i \mathcal{L}_i(\phi_i, \theta_i; \mathbf{x}) \quad (\text{S16})$$

964 The parameter vectors  $\mathbf{w}$ ,  $\boldsymbol{\phi}$ , and  $\boldsymbol{\theta}$  are defined as:

$$\mathbf{w} := \{w_1, \dots, w_k\} \quad (\text{S17})$$

$$\boldsymbol{\phi} := \{\phi_1, \dots, \phi_k\} \quad (\text{S18})$$

$$\boldsymbol{\theta} := \{\theta_1, \dots, \theta_k\} \quad (\text{S19})$$

965 For the  $i$ -th component, the likelihood of parameters  $\phi_i$  and  $\theta_i$  given the data is  
 966 the product of the probability densities of each datum  $(x_1, x_2, \dots, x_n)$ :

$$\mathcal{L}_i(\phi_i, \theta_i; \mathbf{x}) = \prod_{j=1}^n f_i(x_j; \phi_i, \theta_i) \quad (\text{S20})$$

967 To obtain reasonable fits, I found it necessary to modify the likelihood to incorpo-  
 968 rate left- and right-censored data. This is because the stomatal ratio dataset contains  
 969 many 0's (all stomata are on the lower surface of the leaf) and 1's (all stomata on the  
 970 upper surface). Under most parameterizations of the Beta distribution, the proba-  
 971 bility density of 0 and 1 is  $\infty$  or 0. I left- and right-censored the data at  $x_l = 0.001$   
 972 and  $x_r = 0.999$  as these were very close to the lowest and highest values reported  
 973 in the dataset (except 0 and 1), respectively. This means that any datum reported  
 974 as 0 was statistically interpreted as falling anywhere between 0 and 0.001. Likewise,  
 975 a datum reported as 1 was assumed to fall between 0.999 and 1. A reasonable in-  
 976 terpretation is that a stomatal ratio so close to 0 or 1 would be practically difficult  
 977 to measure. Biologically, a stomatal ratio less than 0.001 or greater than 0.999 are

indistinguishable from 0 and 1. With censoring, the likelihood of the  $i$ -th component becomes:

$$\mathcal{L}_i(\phi_i, \theta_i; \mathbf{x}) = \prod_{j=1}^n f(x; \phi_i, \theta_i)^{I_l(x)I_r(x)} F(x_l; \phi_i, \theta_i)^{1-I_l(x)} (1 - F(x_r; \phi_i, \theta_i))^{1-I_r(x)} \quad (\text{S21})$$

$F(x; \phi_i, \theta_i)$  is the cumulative density function of the Beta distribution;  $I_l(x)$  and  $I_r(x)$  are indicator functions:

$$I_l(x) = \begin{cases} 0 & \text{if } x = x_l \\ 1 & \text{if } x \neq x_l \end{cases} \quad (\text{S22})$$

$$I_r(x) = \begin{cases} 0 & \text{if } x = x_r \\ 1 & \text{if } x \neq x_r \end{cases} \quad (\text{S23})$$

To find the maximum likelihood mixture distribution, I used an expectation-maximization (EM) algorithm similar to [107]. EM algorithms are particularly well-suited to fitting mixture distributions. Here, I describe the initialization, expectation (E-step), and maximization (M-step) procedure.

## Initialization

The data were divided into  $k$  evenly-sized components. For example, if  $k = 2$ , data below the median were assigned to component 1; data above the median were

assigned to component 2. For each component, the initial weight was therefore  $w_{i,\text{init}} = 1/k$ . Within each component, I used the `optim` function in R to estimate the maximum likelihood parameters ( $\hat{\phi}_i^{(\text{init})}$  and  $\hat{\theta}_i^{(\text{init})}$ ) of a Beta distribution. Note that I am using parenthetical superscript to indicate the iteration of the algorithm, starting with the initial parameterization, followed by  $t = 1, 2, 3, \dots$  until the likelihood converges. The initial parameter vectors are therefore:

$$\mathbf{w}^{(\text{init})} := \{1/k, \dots, 1/k\} \quad (\text{S24})$$

$$\boldsymbol{\phi}^{(\text{init})} := \{\hat{\phi}_1^{(\text{init})}, \dots, \hat{\phi}_k^{(\text{init})}\} \quad (\text{S25})$$

$$\boldsymbol{\theta}^{(\text{init})} := \{\hat{\theta}_1^{(\text{init})}, \dots, \hat{\theta}_k^{(\text{init})}\} \quad (\text{S26})$$

## Expectation

In the E-step, the expected likelihood is calculated under the parameters estimated from the previous iteration. The mixture weights are then updated and carried forward to the M-step. For the first iteration following initialization, the mixture weights  $\mathbf{w}^{(1)}$  conditional on the initial parameterization are:

$$w_i^{(1)} = \frac{\sum_{j=1}^N y_{ij}^{(\text{init})}}{n} \quad (\text{S27})$$

where  $y_{ij}^{(\text{init})}$  is the probability that  $x_j$  belongs to component  $i$  given initial parameters:

$$y_{ij}^{(\text{init})} = \frac{w_i^{(\text{init})} f(x_j; \hat{\phi}_i^{(\text{init})}, \hat{\theta}_i^{(\text{init})})}{g(x_j; k, \mathbf{w}^{(\text{init})}, \boldsymbol{\phi}^{(\text{init})}, \boldsymbol{\theta}^{(\text{init})})} \quad (\text{S28})$$

In subsequent iterations, the equations are similarly:

$$w_i^{(t+1)} = \frac{\sum_{j=1}^N y_{ij}^{(t)}}{N} \quad (\text{S29})$$

$$y_{ij}^{(t)} = \frac{w_i^{(t)} f(x_j, \phi_i^{(t)}, \theta_i^{(t)})}{g(x_j; k, \mathbf{w}^{(t)}, \boldsymbol{\phi}^{(t)}, \boldsymbol{\theta}^{(t)})} \quad (\text{S30})$$

## 1002 Maximization

1003 During the M-step, estimates of  $\boldsymbol{\phi}$  and  $\boldsymbol{\theta}$  are updated using maximum likelihood  
1004 conditional on mixture weights calculated in the E-step:

$$\{\boldsymbol{\phi}^{(t+1)}, \boldsymbol{\theta}^{(t+1)}\} = \arg \max_{\boldsymbol{\phi}, \boldsymbol{\theta}} \mathcal{L}(\boldsymbol{\phi}, \boldsymbol{\theta}; \mathbf{x}, k, \mathbf{w}^{(t)}) \quad (\text{S31})$$

1005 I used the optim function in R to find the parameters that maximized the likelihood  
1006 function. After the M-step, the next iteration begins at the E-step and continues  
1007 until the likelihood converges to a stable value. As with other hill-climbing likelihood  
1008 searches, EM does not guarantee convergence at the maximum likelihood. With the  
1009 stomatal ratio data, I found that multiple initialization procedures yielded the same  
1010 final parameter estimates, suggesting that the algorithm was successfully converging  
1011 on the maximum likelihood solution.
